# Supplementary material for: The Biomarker Toolkit — an evidence-based guideline to predict cancer biomarker success and guide development
Source: Springer Nature journal article supplement (doi:10.1186/s12916-023-03075-3), 2023-10-04
Supplement: MOESM1 [file 26126656]

**Additional File Table S1: Search terms used in four systematic literature searches.**

|           | <i>SEARCH TERMS</i>                                                                                                                                                                                                                                                                                                          | <i>MEDLINE</i> | <i>EMBASE</i> |
|-----------|------------------------------------------------------------------------------------------------------------------------------------------------------------------------------------------------------------------------------------------------------------------------------------------------------------------------------|----------------|---------------|
| <b>1</b>  | exp Biomarkers, Tumor/                                                                                                                                                                                                                                                                                                       | 244390         |               |
| <b>2</b>  | ((cancer or tumo?r) adj3 biomarker*).mp. [mp=title, abstract, original title, name of substance word, subject heading word, floating sub-heading word, keyword heading word, organism supplementary concept word, protocol supplementary concept word, rare disease supplementary concept word, unique identifier, synonyms] | 141127         | 24204         |
| <b>3</b>  | exp Translational Medical Research/                                                                                                                                                                                                                                                                                          | 9465           |               |
| <b>4</b>  | translation*.mp.                                                                                                                                                                                                                                                                                                             | 255328         | 279061        |
| <b>5</b>  | Clinical effectiveness.mp. or Treatment Outcome/                                                                                                                                                                                                                                                                             | 912234         | 918147        |
| <b>6</b>  | Clinical effectiveness.mp.                                                                                                                                                                                                                                                                                                   | 10384          | 122219        |
| <b>7</b>  | pipeline*.mp.                                                                                                                                                                                                                                                                                                                | 19014          | 27694         |
| <b>8</b>  | Clinical application*.mp.                                                                                                                                                                                                                                                                                                    | 77105          | 103379        |
| <b>9</b>  | (clinical* adj4 relevant).mp. [mp=title, abstract, original title, name of substance word, subject heading word, floating sub-heading word, keyword heading word, organism supplementary concept word, protocol supplementary concept word, rare disease supplementary concept word, unique identifier, synonyms]            | 73027          | 111573        |
| <b>10</b> | utility.mp.                                                                                                                                                                                                                                                                                                                  | 184411         | 259264        |
| <b>11</b> | 1 or 2                                                                                                                                                                                                                                                                                                                       | 253003         |               |
| <b>12</b> | 3 or 4                                                                                                                                                                                                                                                                                                                       | 255328         |               |
| <b>13</b> | 5 or 6 or 7 or 8 or 9 or 10                                                                                                                                                                                                                                                                                                  | 1241371        |               |
| <b>14</b> | 11 and 12 and 13                                                                                                                                                                                                                                                                                                             | 336            |               |
| <b>15</b> | exp translational research/                                                                                                                                                                                                                                                                                                  |                | 15665         |
| <b>16</b> | 2 or 15                                                                                                                                                                                                                                                                                                                      |                | 286660        |
| <b>17</b> | 4 or 16                                                                                                                                                                                                                                                                                                                      |                | 279061        |
| <b>18</b> | 13 and 17 and 20                                                                                                                                                                                                                                                                                                             |                | 436           |

|           |                                                                                                                                                              |      |      |
|-----------|--------------------------------------------------------------------------------------------------------------------------------------------------------------|------|------|
| <b>19</b> | Oncotype DX or Oncotype-DX or Oncotype - DX or 12 gene or 21-gene or 21 - gene or recurrence score                                                           | 2309 | 4791 |
| <b>20</b> | MapQuant Dx or MapQuantDx or GGI or Genomic Grade Index or reduced Genomic Grade Index or reduced GGI or rGGI or GGI reduced or GGIr or 97-gen* or 97 gen*). | 442  | 718  |
| <b>21</b> | MammaPrint or Mamma-Print or Mamma Print or 70 gene signature or 70gene signature or 70-gene signature                                                       | 209  | 674  |

- 1
- 2
- 3
- 4
- 5
- 6
- 7
- 8
- 9
- 10
- 11
- 12
- 13
- 14
- 15
- 16
- 17
- 18
- 19
- 20
- 21
- 22
- 23
- 24
- 25
- 26

27

| <b>Additional File Table S2: Guidelines used to extract characteristics associated with successful Biomarkers</b> |                                                                       |
|-------------------------------------------------------------------------------------------------------------------|-----------------------------------------------------------------------|
| <b>Guideline Name</b>                                                                                             | <b>Study Type</b>                                                     |
| STARD                                                                                                             | Diagnostic/prognostic studies                                         |
| TRIPOD                                                                                                            | Diagnostic/prognostic studies                                         |
| REMARK                                                                                                            | Tumour Marker Prognostic studies                                      |
| ARRIVE                                                                                                            | Animal pre-clinical studies                                           |
| CHEERS                                                                                                            | Economic evaluation                                                   |
| CONSORT                                                                                                           | Randomised trials                                                     |
| STROBE                                                                                                            | Observational studies                                                 |
| QUADAS2                                                                                                           | Risk of bias and applicability of primary diagnostic accuracy studies |

28

29

| <b>Additional File Table S3: Semi-structured interview participant demographics</b> |                  |                  |                   |                   |                   |
|-------------------------------------------------------------------------------------|------------------|------------------|-------------------|-------------------|-------------------|
| <b>Group</b>                                                                        | <b>Academic</b>  | <b>Clinician</b> | <b>Industry</b>   | <b>CPR/S</b>      | <b>Total</b>      |
| Participant number                                                                  | 8                | 10               | 8                 | 8                 | 34                |
| Sex (M: F)                                                                          | (2:6)            | (10:0)           | (4:4)             | (1:7)             | (27:17)           |
| Age (mean $\pm$ STDEV)                                                              | 37.88 $\pm$ 6.38 | 44.5 $\pm$ 11.40 | 44.75 $\pm$ 11.62 | 64.75 $\pm$ 10.96 | 47.76 $\pm$ 14.05 |
| *CPR/S: Cancer Patient Representatives/Survivors                                    |                  |                  |                   |                   |                   |

30

31

32

33

34

35

36

37

38

39

40

41

42

43

44

45

| Additional File Table S4: Delphi Participant Demographics |               |                                      |            |
|-----------------------------------------------------------|---------------|--------------------------------------|------------|
|                                                           |               |                                      | 46         |
| <b>Years of experience (y ± STDEV)</b>                    | 7.9 (± 7.69)  | <b>Expertise n (%)</b>               | 47         |
| <b>Male: Female</b>                                       | 33:21         | <i>Academia, industry</i>            | 1 (1.85)   |
| <b>Age (±STDEV)</b>                                       | 42.66 (14.35) | <i>Academia</i>                      | 15 (27.78) |
| <b>Ethnicity (%)</b>                                      |               | <i>Academia, Clinician</i>           | 21 (38.89) |
| <i>White</i>                                              | 43 (79.63)    | <i>Clinician</i>                     | 7 (12.96)  |
| <i>Asian</i>                                              | 6 (11.11)     | <i>Industry</i>                      | 4 (7.41)   |
| <i>Arab</i>                                               | 2 (3.70)      | <i>Research Institute</i>            | 4 (7.41)   |
| <i>Middle east</i>                                        | 1 (1.85)      | <i>Academia, Industry, Clinician</i> | 2 (3.70)   |
| <i>Kurdish</i>                                            | 1 (1.85)      |                                      |            |
| <i>Other</i>                                              | 1 (1.85)      |                                      |            |

60

61

62

63

64

65

66

67

68

69

70

71

72

73

74

75

76

**Additional File Table S5: Table indicating a modified version of PRISMA flow diagram.** For simplicity and more effective representation of the large number of systematic searches, PRISMA flow diagram was tabulated. This tabulated PRISMA indicates details of systematic searches of 4 successful and 32 stalled breast cancer biomarkers.

|                                                                                                                                         | IDENTIFICATION |        |         |                | SCREENING                       | ELIGIBILITY                         | INCLUDED          |                             |
|-----------------------------------------------------------------------------------------------------------------------------------------|----------------|--------|---------|----------------|---------------------------------|-------------------------------------|-------------------|-----------------------------|
|                                                                                                                                         | All Articles   | Embase | Medline | Extra articles | Records after duplicate removal | Full Articles assed for eligibility | Selected articles | Types of Articles selected* |
| 264-gene signature or 264 gene signature or 264 gen* signature or 264-gen* signature or Novel2 or Novel 2                               | 4,859          | 2,895  | 1,964   | 0              | 3,295                           | 1                                   | 1                 | 1C                          |
| 26 gene stroma-derived prognostic predictor or 26-gene stroma-derived prognostic predictor or 26 gene* or 26-gene* or SDPP              | 3,255          | 1,911  | 1,344   | 0              | 2,105                           | 12                                  | 1                 | 1C                          |
| 8-gene genomic grade index or 8 gene genomic grade index or 8-gene* or 8 gene* or GGI8                                                  | 9,805          | 6,225  | 3,580   | 0              | 6,555                           | 9                                   | 1                 | 1C                          |
| 7-gene immune response module or 7-gene immune response module or immune response module or IR7 or 7 gene* or 7-gene*                   | 8,255          | 5,523  | 2,732   | 0              | 5,791                           | 10                                  | 1                 | 1C                          |
| MAGE-A or MAGEA or melanoma antigen family A                                                                                            | 678            | 393    | 285     | 0              | 415                             | 8                                   | 8                 | 8C                          |
| 26-gene signature or 26 gene signature or 26 gene* or 26-gene* or Novel 1 or Novel1                                                     | 7,070          | 4,236  | 2,834   | 0              | 4,878                           | 9                                   | 1                 | 1C                          |
| B-cell:IL8 ratio or B-cell:Interleukin 8 ratio or (B-cell and Interleukin 8) or (B-cell and IL8) or Bcell signature or B-cell signature | 1,551          | 1,276  | 275     | 0              | 1,513                           | 2                                   | 2                 | 2C                          |
| 8-gene* score or 8 gene* score                                                                                                          | 7              | 5      | 2       | 0              | 4                               | 1                                   | 1                 | 1C                          |
| 14-gene metastasis score or 14 gene metastasis score or MS14 or 14-gene* or 14 gene*                                                    | 6,190          | 3,710  | 2,480   | 0              | 3,955                           | 4                                   | 1                 | 1C                          |
| 32-gene p53 status signature or 32 gene p53 status signature or 32 gene* or 32-gene*                                                    | 2,370          | 1,412  | 958     | 0              | 1,520                           | 1                                   | 1                 | 1C                          |
| 64-gene expression signature or 64 gene expression signature or 64 gene* or 64-gene* or Pawitan                                         | 950            | 609    | 341     | 0              | 635                             | 3                                   | 1                 | 1C                          |
| 85-gene signature or 85 gene signature or 85-gene* or 85 gene* or lwao                                                                  | 694            | 408    | 286     | 0              | 421                             | 2                                   | 1                 | 1C                          |
| 92-gene predictor or 92 gene predictor or 92-gene* or 92 gene*                                                                          | 729            | 462    | 267     | 0              | 466                             | 1                                   | 1                 | 1C                          |
| 127-gene classifier or 127 gene classifier or 127-gene* or 127 gene*                                                                    | 360            | 214    | 146     | 1              | 219                             | 0                                   | 0                 | 1C                          |

|                                                                                                                                                            |       |       |       |   |       |    |    |                 |
|------------------------------------------------------------------------------------------------------------------------------------------------------------|-------|-------|-------|---|-------|----|----|-----------------|
| 158 gene HER2-derived prognostic predictor or 158-gene HER2-derived prognostic predictor or HDPP or 158 gen* or 158-gen*                                   | 424   | 255   | 169   | 0 | 266   | 1  | 1  | 1C              |
| 368-gene medullary breast cancer like signature or 368 gene medullary breast cancer like signature or 368 gene* or 368 gene*                               | 124   | 77    | 47    | 0 | 79    | 1  | 1  | 1C              |
| 512 gene signature or 512-gene signature or 512-gene* or 512 gene* or Olaf                                                                                 | 229   | 131   | 98    | 0 | 158   | 2  | 1  | 1C              |
| Cell cycle pathway signature or CCPs or cell cycle signature                                                                                               | 1,188 | 695   | 493   | 0 | 769   | 1  | 1  | 1C              |
| GCNs of MET or gene copy number of MET or MET GCN or MET Gene copy number                                                                                  | 226   | 147   | 79    | 0 | 43    | 1  | 1  | 1C              |
| T-cell Metagene or T cell Metagene or T cell signature or T-cell signature                                                                                 | 194   | 148   | 46    | 0 | 143   | 4  | 1  | 1C              |
| (Hormone receptor negative and triple negative) or 14 GENE* or 14-GENE*).                                                                                  | 6,533 | 3,958 | 2,575 | 0 | 4,272 | 12 | 1  | 1C              |
| (HOXB13:IL17BR or (HOXB13 and IL17BR))                                                                                                                     | 98    | 75    | 23    | 1 | 94    | 9  | 7  | 7C              |
| 28-gen* or 28 gen*                                                                                                                                         | 3,302 | 2,037 | 1,265 | 0 | 2,186 | 1  | 1  | 1C              |
| GeneSearch Breast Lymph Node Assay or GeneSearch or Breast Lymph Node Assay CHECK                                                                          | 91    | 62    | 29    | 1 | 67    | 10 | 10 | 2C, 5CU & 3AV   |
| ((cytokeratin-19 or cytokeratin 19 or CK-19 or CK 19) and (mammaglobin or MGB)) or METASIN                                                                 | 217   | 168   | 49    | 0 | 149   | 7  | 6  | 4C,2A V         |
| BreastPRS or 200 gene* signature or 200 gene* algorithm                                                                                                    | 13    | 9     | 4     | 0 | 11    | 1  | 1  | 1C              |
| Mammostrat or (immunohistochemical adj2 five) or IHC assay                                                                                                 | 1,470 | 1,070 | 400   | 0 | 1,024 | 8  | 6  | 5C, 1 CU        |
| Breast Cancer Index or ((2-gene or HoxB13 IL17BR ratio index or HI) and (Molecular Grade Index or 5-gene microarray assay))                                | 206   | 152   | 54    | 0 | 166   | 13 | 11 | 8C, 3 CU        |
| Rotterdam gene signature or Rotterdam Signature or Rotterdam gen* or 76-gene or 76-gene or 76 gen*                                                         | 600   | 361   | 239   | 0 | 379   | 5  | 4  | 4C              |
| ICH4 or ICH-4 or IHC4+C or immunohistochemicaladj2 four                                                                                                    | 261   | 146   | 115   | 0 | 150   | 16 | 13 | 8C, 5 CU        |
| MapQuant Dx or MapQuantDx or GGI or Genomic Grade Index or reduced Genomic Grade Index or reduced GGI or rGGI or GGI reduced or GGlr or 97-gen* or 97 gen* | 1,160 | 718   | 442   | 0 | 764   | 21 | 14 | 10C, 4 CU       |
| EpClin or EndoPredict or Endopredict or 11 gene* or 11-gene*                                                                                               | 8,023 | 4,796 | 3,227 | 0 | 4,972 | 33 | 20 | 5C, 13 CU, 2 AV |
| 186 gen* or invasive gene signature or IGS                                                                                                                 | 7,021 | 3,949 | 3,072 | 0 | 4,370 | 13 | 1  | 1C              |
| Prosigna or PAM50 or 50 GENE* or 50-GENE* ROR Score or Risk of recurrence score                                                                            | 5,310 | 3,470 | 1,840 | 0 | 3,555 | 37 | 35 | 22C, 9 CU, 4AV  |
| MammaPrint or Mamma-Print or Mamma Print or 70 gene signature or 70 gene signature or 70-gene signature                                                    | 883   | 674   | 209   | 0 | 684   | 87 | 71 | 34 C, 33CU, 4AV |

|                                                                                                                                                                                                                                 |              |              |              |          |              |            |            |                          |
|---------------------------------------------------------------------------------------------------------------------------------------------------------------------------------------------------------------------------------|--------------|--------------|--------------|----------|--------------|------------|------------|--------------------------|
| <b>Oncotype DX or Oncotype-DX or Oncotype – DX or 12 gene or 21-gene or 21 – gene or recurrence score</b>                                                                                                                       | <b>7,100</b> | <b>4,791</b> | <b>2,309</b> | <b>0</b> | <b>5,884</b> | <b>376</b> | <b>251</b> | <b>44 C, 205 CU, 2AV</b> |
| * In some cases CU studies addressed more than one category hence the discrepancy between the "Number of selected articles" and "Types of articles selected".                                                                   |              |              |              |          |              |            |            |                          |
| CL: Clinical Studies, CU: Clinical Utility Studies, AV: Analytical Validity Studies, HF: Human Factor Studies, CE: Cost Effectiveness Studies, DA: Decisional Analysis, IMPL: Implementation Studies, FEAS: Feasibility Studies |              |              |              |          |              |            |            |                          |

77

78

**Additional File Table S6: Table indicating a modified version of PRISMA flow diagram.** For simplicity and more effective representation of the large number of systematic searches, PRISMA flow diagram was tabulated. This tabulated PRISMA indicates details of systematic searches of 2 successful and 5 stalled breast cancer biomarkers.

| Biomarker of interest                                                                                                                                                                                                           | IDENTIFICATION |        |         |                | SCREENING                        | ELIGIBILITY                            | INCLUDED          |                                            |
|---------------------------------------------------------------------------------------------------------------------------------------------------------------------------------------------------------------------------------|----------------|--------|---------|----------------|----------------------------------|----------------------------------------|-------------------|--------------------------------------------|
|                                                                                                                                                                                                                                 | All Articles   | Embase | Medline | Extra Articles | Records after duplicated Removal | Full Articles Assessed for eligibility | Selected Articles | Types of articles selected                 |
| BRAF                                                                                                                                                                                                                            | 4911           | 3588   | 1323    | 7              | 3909                             | 3909                                   | 125               | 51 CL, 22 AV, 27 IMPL, 5 FEAS, 17 CU, 3 CE |
| KRAS                                                                                                                                                                                                                            | 8958           | 6785   | 2173    |                | 3134                             | 3134                                   | 139               | 81CI, 6 CE, 44 CU, 4 FEAS, 3 IMPL, 1HF     |
| PIK3CA                                                                                                                                                                                                                          | 1471           | 1201   | 270     | 3              | 489                              | 489                                    | 54                | 47CI, 2AV, 2CU, 2 IMPL, 1FEAS              |
| Immunoscore                                                                                                                                                                                                                     | 531            | 388    | 143     | 6              | 960                              | 960                                    | 12                | 12CI                                       |
| PTEN                                                                                                                                                                                                                            | 1111           | 857    | 254     | 5              | 761                              | 761                                    | 40                | 40 CI                                      |
| PD-L1                                                                                                                                                                                                                           | 860            | 673    | 187     | 11             | 123                              | 123                                    | 22                | 20CL, 1CU, 1AV                             |
| Onco-Dx                                                                                                                                                                                                                         | 134            | 80     | 54      | 0              | 3909                             | 3909                                   | 10                | 4CI, 4 DA, 1HF, 1CE                        |
|                                                                                                                                                                                                                                 |                |        |         |                |                                  |                                        |                   |                                            |
| * In some cases CU studies addressed more than one category hence the discrepancy between the "Number of selected articles" and "Types of articles selected".                                                                   |                |        |         |                |                                  |                                        |                   |                                            |
| CL: Clinical Studies, CU: Clinical Utility Studies, AV: Analytical Validity Studies, HF: Human Factor Studies, CE: Cost Effectiveness Studies, DA: Decisional Analysis, IMPL: Implementation Studies, FEAS: Feasibility Studies |                |        |         |                |                                  |                                        |                   |                                            |

79

80

81

82

83

84

85

86

87

| <b>Additional File Table S7: Detailed Attributes extracted from systematic literature and guidelines.</b> |                                                                          |                                   |                                                                                                                                                                                                                                                                                     |
|-----------------------------------------------------------------------------------------------------------|--------------------------------------------------------------------------|-----------------------------------|-------------------------------------------------------------------------------------------------------------------------------------------------------------------------------------------------------------------------------------------------------------------------------------|
| <b>MAIN CATEGORY</b>                                                                                      | <b>ATTRIBUTE DETAIL</b>                                                  | <b>SUB-ATTRIBUTE CATEGORY</b>     | <b>REFERENCE</b>                                                                                                                                                                                                                                                                    |
| <b>RATIONALE</b>                                                                                          | Identify the unmet clinical need for a biomarker                         | <i>Unmet need</i>                 | Monaghan et al., 2018;<br>Taube 2009                                                                                                                                                                                                                                                |
|                                                                                                           | Verify the unmet need for the biomarker - is there an existing solution? | <i>Verification of unmet Need</i> | Taube et al. 2009;<br>CONSORT 2010; STROBE;<br>ARRIVE;<br>Conley & Taube 2004;<br>SQUIRE                                                                                                                                                                                            |
|                                                                                                           | Study states the pre-specified hypothesis                                | <i>Pre-specified hypothesis</i>   | Sauerbrei et al., 2014;<br>REMARK<br>CONSORT (2010)<br>STROBE<br>STARD                                                                                                                                                                                                              |
|                                                                                                           | BM type:<br><b>Screening/ Diagnostic BMs</b>                             | <i>BM type</i>                    | Pavlou et al., 2013; Silva<br>2015; Cho 2007; Baker<br>2009;<br>Hendriks et al.;2017                                                                                                                                                                                                |
|                                                                                                           | <b>Predictive BMs</b>                                                    |                                   | Rodrigues-Enriques et al.,<br>2011; Ellis et al.,2011,<br>Harris et al.,2007;<br>Landgren & Morgan<br>2014;<br>Kalia 2015; Merrer &<br>Dieterle 2008; Taube<br>2009; Montie & Meyers<br>1997; Fertig & Hayes<br>2001; Schneider et al.,<br>2015;<br>Conley & Taube 2004             |
|                                                                                                           | <b>Pharmacodynamic BMs</b>                                               |                                   | Modur et al., 2013;<br>Merrer & Dieterle 2008                                                                                                                                                                                                                                       |
|                                                                                                           | <b>Response BMs</b>                                                      |                                   | Modur et al., 2013                                                                                                                                                                                                                                                                  |
|                                                                                                           | <b>Prognostic BMs</b>                                                    |                                   | Ellis et al., 2011; Ocker<br>(2018)<br>Juarez-Hernandez et al.,<br>2017; Seregini et al., 2004;<br>Baker 2009; Conley &<br>Taube 2004; Yang et al.,<br>2019;<br>Kalia 2015; Pollack et al.,<br>1998; Sturgeon 2010;<br>Pavlou et al., 2013; Silva<br>2015;<br>Cho 2007; Baker 2009; |



|                            |                                                                                                                                                                                            |                                      |                                                                                                                                                                                                                                                                                                                                                                                    |
|----------------------------|--------------------------------------------------------------------------------------------------------------------------------------------------------------------------------------------|--------------------------------------|------------------------------------------------------------------------------------------------------------------------------------------------------------------------------------------------------------------------------------------------------------------------------------------------------------------------------------------------------------------------------------|
|                            |                                                                                                                                                                                            |                                      | Pollack et al. 1998; Sturgeon 2010; Volpe et al., 2018; Montie & Meyers 1997; Harris et al., 2007; Volpe et al., 2018 Merrer & Dieterle (2008) Pavlou et al. (2013) Juarez-Hernandez et al. (2017) Juarez-Hernandez et al. (2017) Sauerbrei et al. (2014) – REMARK Pepe et al. (2008) - PROBE                                                                                      |
| <b>ANALYTICAL VALIDITY</b> | Was the sample collected from the organ(s) of origin / was the biospecimen obtained from diseased section? (If sample was obtained from a distal source or adjacent, e.g. blood, score 0). | <i>Anatomical or collection site</i> | Gromov et al., 2014 ; BRISQ                                                                                                                                                                                                                                                                                                                                                        |
|                            | Is the proximity to primary pathology of interest stated?                                                                                                                                  | <i>Anatomical or collection site</i> | Gromov et al., 2014 ; BRISQ                                                                                                                                                                                                                                                                                                                                                        |
|                            | Study acknowledges noncompliance (deviation from protocol)                                                                                                                                 | <i>Assay Validation</i>              | Baker. 2009                                                                                                                                                                                                                                                                                                                                                                        |
|                            | Study adjusts for post screening noise                                                                                                                                                     | <i>Assay Validation</i>              | Baker 2009; Pepe et al., 2015 & Ewaisha et al., 2015                                                                                                                                                                                                                                                                                                                               |
|                            | Is biomaker analyte linear on dilution? Analyte recovery should also be documented                                                                                                         | <i>Assay Validation</i>              | Hayes et al., 1996; T.W., N.E., & J.D., 2001; Kensler et al., 2001; Cumminget et al., 2008; Sturgeon et al 2010                                                                                                                                                                                                                                                                    |
|                            | Is the technique quality assured (i.e., is it a commercially available assay kit, or a widely known/used techqniue)?                                                                       | <i>Assay Validation</i>              | Sauerbrei et al., 2014; REMARK                                                                                                                                                                                                                                                                                                                                                     |
|                            | Are the biomarker test results reproducible: is the biomarker test repeated in duplicates/triplicates for each specimen?                                                                   | <i>Assay Validation</i>              | Taube et al., 2009; Tan et al., 2009; Helzlsouer 1994; Boutros 2015; Hayes et al., 1996; Feng, Kagan, Pepe, Thornquist, Ann Rinaudo, et al., 2013; Fuzery et al., 2013 Cummings et al., 2008; Hristova & Chan, 2019; Zhang & Chan 2010; Pavlou et al. 2013; Duffy & Sturgeon 2015; Conley & Taube 2004; Sauerbrei et al. 2014; REMARK Miquel-Cases et al. 2017; Hayes et al., 2013 |

|  |                                                                                                                                                                 |                         |                                                                                                                                                                                                                                                                                                              |
|--|-----------------------------------------------------------------------------------------------------------------------------------------------------------------|-------------------------|--------------------------------------------------------------------------------------------------------------------------------------------------------------------------------------------------------------------------------------------------------------------------------------------------------------|
|  | Is the study repeatable; was the biomarker tested in different laboratories?                                                                                    | <i>Assay Validation</i> | Taube et al., 2009; Tan et al., 2009; Helzlsouer 1994; Boutros 2015, Zhang & Chan 2010; Pavlou et al., 2013; Duffy & Sturgeon 2015; Conley & Taube 2004; Sauerbrei et al., 2014, REMARK, Miquel-Cases et al., 2017; Hayes et al., 2013                                                                       |
|  | Is the level of biomarker biological noise/background tested (i.e., is the influence of biomarker cross-reactivity or carry over addressed in the methodology?) | <i>Assay Validation</i> | Sauerbrei et al., 2014; REMARK; STARD; Tockman et al., 1992; Hammond & Taube 2002; Paulovich et al., 2008.                                                                                                                                                                                                   |
|  | Does the biomarker assessment methodology include use of calibration curves to define analyte concentration?                                                    | <i>Assay Validation</i> | Cummings et al., 2008; George, 2008; Chau et al., 2009; Fuzery et al., 2013                                                                                                                                                                                                                                  |
|  | Analytical sensitivity-has the limit of detection for the biomarker been stated?                                                                                | <i>Assay Validation</i> | Hayes et al., 1996; Cummings et al., 2008; Chau et al., 2009; Daidone et al., 2011; Wagner & Srivastava, 2012c; Fuzeri et al., 2013; Mordente et al., 2015; Salgado et al., 2017; Hristova & Chan, 2019                                                                                                      |
|  | Does the biomarker assay consider the degree of analytical variation, e.g. does it take into consideration the influence of unrelated matrix components?        | <i>Assay Validation</i> |                                                                                                                                                                                                                                                                                                              |
|  | Does the study include methods to understand biomarker variability, e.g. does it include the effects of time as variable?                                       | <i>Assay Validation</i> | TRIPOD                                                                                                                                                                                                                                                                                                       |
|  | Is the variability of biomarker measurement addressed, e.g. does the study evaluate coefficient of variation?                                                   | <i>Assay Validation</i> | Wagner & Srivastava, 2012c; Weber et al., 2012a; Bossuyt et al., 2003; Mcshane et al., 2005; Cummings et al., 2008; George, 2008; Paulovitch et al., 2008; Chau et al., 2009; Viale et al., 2009; Sturgeon et al., 2010; Fuzery et al., 2013; Network, 2016; Salgado et al., 2017; Miquel-cases et al., 2017 |
|  | Are the reagents used quality assured, i.e., from a commercial seller?                                                                                          | <i>Assay Validation</i> | Sauerbrei et al., 2014; REMARK                                                                                                                                                                                                                                                                               |

|  |                                                                                                                                                                                                                                                                               |                                                 |                                                                                                                                                                                                                                          |
|--|-------------------------------------------------------------------------------------------------------------------------------------------------------------------------------------------------------------------------------------------------------------------------------|-------------------------------------------------|------------------------------------------------------------------------------------------------------------------------------------------------------------------------------------------------------------------------------------------|
|  | Does the study specify the assay method/technique used?                                                                                                                                                                                                                       | <i>Assay Validation</i>                         | Conley & Taube., 2004; Sauerbrei et al., 2014; REMARK                                                                                                                                                                                    |
|  | Is the biomarker study validated/standardised/optimised?                                                                                                                                                                                                                      | <i>Assay Validation</i>                         | Hammond & Taube, 2002; Taube et al., 2009; Schneider et al., 2015; Modur et al., 2013; Merrer & Dieterle. 2008; Hayes 2013; Sargent & Allegra 2002; Montie & Meyers 1997; Conley & Taube 2004                                            |
|  | Was the sample collected using a standardised protocol (SOP-Standard Operating Procedure)?                                                                                                                                                                                    | <i>Biospecimen Collection Technique</i>         | Gion & Fabricio 2018;King et al., 2014; Duffy & Sturgeon 2015; Pavlou et al., 2013; Ewaisha et al., 2015; Hritsova & Chan 2019;Hayes 2013; Maes 2015; Pepe et al., 2008;PROBE; Hammond & Taube 2002; CONSORT 2010; Baker 2009; Wang 2014 |
|  | Does the study specify detailed procedures for specimen collection (e.g. whether samples were collected before or after study question was set, were collected from patients with refractory disease or at time of relapse or were collected when patient was dead or alive)? | <i>Biospecimen Collection Technique</i>         | Pepe et al., 2008; PROBE; Hammond & Taube 2002; CONSORT 2010;Baker 2009; BRISQ; Rimza et al. 2016; Costello et al., 2011                                                                                                                 |
|  | Is the method of biospecimen attainment stated (e.g., fine needle aspiration, pre-operative blood draw)?                                                                                                                                                                      | <i>Biospecimen Collection Technique</i>         | BRISQ                                                                                                                                                                                                                                    |
|  | Is the collection container of the biospecimen stated?                                                                                                                                                                                                                        | <i>Biospecimen Collection Technique</i>         | BRISQ                                                                                                                                                                                                                                    |
|  | Is the size or weight of solid biospecimen samples being processed clearly stated (e.g., cubes approximately 0.5 cm on a side, 0.5 gram)?                                                                                                                                     | <i>Biospecimen Collection Technique</i>         | BRISQ                                                                                                                                                                                                                                    |
|  | Are the inclusion/exclusion criteria of the biomarker stated (e.g., a minimum threshold for DNA, minimum amount of tumour cells in the sample)?                                                                                                                               | <i>Biospecimen Inclusion/Exclusion Criteria</i> | Mordente et al., 2015 & BRISQ                                                                                                                                                                                                            |
|  | Is the specimen condition is described, e.g. frozen, fresh, primary, metastatic?                                                                                                                                                                                              | <i>Biospecimen matrix/type</i>                  | Hammond & Taube 2002                                                                                                                                                                                                                     |
|  | Is the specimen described as solid tissue, whole blood or serum/plasma/isolated cells?                                                                                                                                                                                        | <i>Biospecimen matrix/type</i>                  | Sauerbrei et al. 2014; REMARK                                                                                                                                                                                                            |
|  | If applicable, are cell culture details described?                                                                                                                                                                                                                            | <i>Cell Culture</i>                             |                                                                                                                                                                                                                                          |
|  | Do the authors mention sample stability?                                                                                                                                                                                                                                      | <i>Biospecimen Quality</i>                      | BRISQ                                                                                                                                                                                                                                    |

|  |                                                                                                                                                                                                                                                |                                           |                         |
|--|------------------------------------------------------------------------------------------------------------------------------------------------------------------------------------------------------------------------------------------------|-------------------------------------------|-------------------------|
|  | Description of storage; is the sample stored stably (e.g., stated frozen temperature or fixed)?                                                                                                                                                | <i>Biospecimen Quality</i>                | BRISQ                   |
|  | Are cycles of freeze and thaw described?                                                                                                                                                                                                       | <i>Biospecimen Quality</i>                | BRISQ                   |
|  | If animals used, is the following defined: species, strain, sex, source, genotype, immune status, developmental stage and weight?                                                                                                              | <i>Experimental animals</i>               | ARRIVE                  |
|  | Is the relevant health status of animals before treatment or testing reported (e.g. weight, microbiological status, and drug or test naïve)?                                                                                                   | <i>Experimental animals</i>               | ARRIVE                  |
|  | Are details of experimental work clearly explained to allow experimental replication?                                                                                                                                                          | <i>Experimental Procedure Description</i> | ARRIVE & STROBE         |
|  | Is the biospecimen processing described, e.g., was the specimen snap frozen, controlled-rate frozen, heparin/citrate/EDTA fixed?                                                                                                               | <i>Mechanism of stabilization/</i>        | BRISQ                   |
|  | If frozen, is the temperature of biospecimen freezing stated?                                                                                                                                                                                  | <i>Mechanism of stabilization/</i>        | BRISQ                   |
|  | Is the constitution and concentration of fixative stated?                                                                                                                                                                                      | <i>Mechanism of stabilization/</i>        | BRISQ                   |
|  | Is the biospecimen processing timing described, e.g., is the time in fixative/preservation solution stated?                                                                                                                                    | <i>Mechanism of stabilization/</i>        | BRISQ                   |
|  | Is the biospecimen method of enrichment stated, e.g., do the authors state that laser-capture microdissection of tissue/block selection for region of lesion/ centrifugation of blood etc. were used to enrich the specimen prior to analysis? | <i>Sample Pre-processing</i>              | BRISQ                   |
|  | Were biospecimen quality-assurance measures applied, e.g., was the RNA of the specimen assessed prior/after long-term storage and immediately before experimental analysis?                                                                    | <i>Sample Pre-processing</i>              | BRISQ;Rimza et al.,2016 |
|  | Is the storage temperature described?                                                                                                                                                                                                          | <i>Storage/Shipping /Transport</i>        | BRISQ                   |
|  | Is the storage duration described?                                                                                                                                                                                                             | <i>Storage/Shipping /Transport</i>        | BRISQ                   |
|  | Are storage details described?                                                                                                                                                                                                                 | <i>Storage/Shipping /Transport</i>        | BRISQ                   |
|  | Are the shipping parameters stated, e.g., vacuum sealing, desiccant, packing material etc. ?                                                                                                                                                   | <i>Storage/Shipping /Transport</i>        | BRISQ                   |
|  | Is shipping temperature (s) stated?                                                                                                                                                                                                            | <i>Storage/Shipping /Transport</i>        | BRISQ                   |
|  | Is shipping duration described?                                                                                                                                                                                                                | <i>Storage/Shipping /Transport</i>        | BRISQ                   |
|  | Is the type of transport container described?                                                                                                                                                                                                  | <i>Storage/Shipping /Transport</i>        | BRISQ                   |
|  | Is the number of freeze-thaw cycles described?                                                                                                                                                                                                 | <i>Storage/Shipping /Transport</i>        | BRISQ                   |
|  | Is the duration of thaw events described?                                                                                                                                                                                                      | <i>Storage/Shipping /Transport</i>        | BRISQ                   |

|                          |                                                                                                                                                                                                                              |                                            |                                                                                                                                                           |
|--------------------------|------------------------------------------------------------------------------------------------------------------------------------------------------------------------------------------------------------------------------|--------------------------------------------|-----------------------------------------------------------------------------------------------------------------------------------------------------------|
|                          | Time from last thaw to processing described?                                                                                                                                                                                 | <i>Storage/Shipping /Transport</i>         | BRISQ                                                                                                                                                     |
|                          | Temperature between last thaw and processing described?                                                                                                                                                                      | <i>Storage/Shipping /Transport</i>         | BRISQ                                                                                                                                                     |
|                          | Does the time or range of time between disease diagnosis and sample acquisition affect bio specimen quality?                                                                                                                 | <i>Time between diagnosis and sampling</i> | STARD                                                                                                                                                     |
|                          | Was the biospecimen collected when the patient was alive (Y) or deceased?                                                                                                                                                    | <i>Vital state of Biospecimen</i>          | STARD                                                                                                                                                     |
| <b>CLINICAL VALIDITY</b> | Does the study mention factors associated with their sample collection (such as fasting status, posture, circadian rhythms, age and sex) and do they investigate their relation to the analyte of interest?                  | <i>Analytical modelling</i>                | Pavlou et al., 2013; Sauerbrei et al., 2014 & REMARK                                                                                                      |
|                          | Model performance: Define all predictors used in developing or validating the multivariable prediction model, including how and when they were measured                                                                      | <i>Analytical modelling</i>                | TRIPOD; Sauerbrei et al., 2014; REMARK; STARD                                                                                                             |
|                          | Model Specification: do the authors present the full prediction model to allow predictions for individuals? Do they mention regression coefficients/confidence intervals/ p values/ baseline survival at a given time point? | <i>Analytical Modelling</i>                | TRIPOD; Sauerbrei et al., 2014; REMARK; STARD                                                                                                             |
|                          | <b>Model-updating:</b> If done, report the results from any model updating (i.e., model specification, model performance)                                                                                                    | <i>Analytical Modelling</i>                | SPIRIT                                                                                                                                                    |
|                          | Were the scientists analysing the biomarker results blinded to the clinical outcome of patients, and vice-versa?                                                                                                             | <i>Blinding</i>                            | Pepe et al., 2008; PROBE; Sauerbrei et al., 2014; REMARK; PROBE                                                                                           |
|                          | Are outcomes reported with precision (e.g. standard error or confidence interval)?                                                                                                                                           | <i>Experimental Outcomes</i>               | STROBE;Duffy & Sturgeon 2015                                                                                                                              |
|                          | Does the index test answer the review question?                                                                                                                                                                              | <i>Experimental Outcomes</i>               | Pepe et al., 2008; PROBE; CONSORT 2010; STROBE; Taube et al., 2009; Sauerbrei et al., 2014; REMARK                                                        |
|                          | How are the biomarker end-points determined: what cut-off or threshold will be used to distinguish positive or negative outcomes?                                                                                            | <i>Experimental Outcomes</i>               | Costello et al., 2011; Pepe et al., 2008; PROBE/Sauerbrei et al., 2014; REMARK; STARD Tockman et al., 1992; Hammond & Taube 2002; Paulovich et al., 2008. |
|                          | Were outcomes reported with precision, e.g. clearly stated with 95% confidence level and effect size?                                                                                                                        | <i>Experimental Outcomes</i>               | STROBE;Duffy & Sturgeon 2015                                                                                                                              |
|                          | Is the data presented as an absolute value as well as relative effect size? (Both are needed to score 1)                                                                                                                     | <i>Experimental Outcomes</i>               | CONSORT 2010; Sauerbrei et al., 2014; REMARK                                                                                                              |
|                          | Is the study externally validated in a separate cohort?                                                                                                                                                                      | <i>External Validation</i>                 | Diamandis 2012; Bast et al., 2005; Schneider et al.,                                                                                                      |

|  |                                                                                                                                                                                                         |                                    |                                                                                                                                                                                  |
|--|---------------------------------------------------------------------------------------------------------------------------------------------------------------------------------------------------------|------------------------------------|----------------------------------------------------------------------------------------------------------------------------------------------------------------------------------|
|  |                                                                                                                                                                                                         |                                    | 2015;<br>Campbell 2016; Hayes et al. 1996; TMUGS; Taube 2009;<br>Shirodkar & Lokeshwar 2008;<br>Taube et al., 2005;<br>Sauerbrei et al., 2014;<br>REMARK; Merrer & Dieterle 2008 |
|  | If relevant, does the study give details of treatments received (including type and timings of chemotherapy courses)?                                                                                   | <i>Intervention</i>                | CONSORT 2010; STARD;<br>Sauerbrei et al., 2014;<br>REMARK                                                                                                                        |
|  | Are the interventions for each group described with sufficient details to allow replication, including how and when they were actually administered?                                                    | <i>Intervention</i>                | CONSORT 2010; STARD;<br>Sauerbrei et al., 2014;<br>REMARK                                                                                                                        |
|  | If present, are changes to the methodology clearly stated in the protocol, e.g., changes in eligibility criteria, with reasoning?                                                                       | <i>Methodology Details</i>         | CONSORT 2010                                                                                                                                                                     |
|  | Is the handling of missing data described?                                                                                                                                                              | <i>Missing Data</i>                | Sauerbrei et al., 2014;<br>REMARK; STROBE;<br>STARD;<br>SQUIRE; Taube 2009;<br>Panis et al., 2016; ARRIVE                                                                        |
|  | Does the study include the participants medical history, including medication and additional disease that might affect the biospecimen?                                                                 | <i>Patient Confounding Factors</i> | Pepe et al., 2008; PROBE;<br>Sauerbrei et al., 2014;<br>REMARK; CONSORT (2010); STROBE; STARD                                                                                    |
|  | Are the eligibility criteria clearly stated, e.g., symptoms, previous test results and inclusion registry?                                                                                              | <i>Patient Eligibility</i>         | STROBE                                                                                                                                                                           |
|  | Exclusion Criteria- Did the study avoid inappropriate exclusions?                                                                                                                                       | <i>Patient Eligibility</i>         | Pepe et al., 2008; PROBE;<br>Sauerbrei et al., 2014;<br>REMARK; CONSORT (2010); STROBE; STARD                                                                                    |
|  | Is the flow of participants through the study described, including the number of participants with and without the outcome and, if applicable, a summary of the follow-up time?                         | <i>Patient Eligibility</i>         | Sauerbrei et al., 2014;<br>REMARK; CONSORT (2010); STROBE; STARD                                                                                                                 |
|  | Are the characteristics of the participants described (basic demographics, clinical features, available predictors), including the number of participants with missing data for predictors and outcome? | <i>Patient Eligibility</i>         | Sauerbrei et al. 2014;<br>REMARK                                                                                                                                                 |
|  | Is the setting, location and dates of eligible patients stated?                                                                                                                                         | <i>Patient Eligibility</i>         | CONSORT 2010; STARD;<br>AGREE 2016; Sauerbrei et al., 2014; REMARK;<br>STROBE; Ewaisha et al., 2015; Pepe et al., 2008;<br>PROBE; Hammond &                                      |

|  |                                                                                                                                                                                                                                                          |                                |                                                                                                                                                                  |
|--|----------------------------------------------------------------------------------------------------------------------------------------------------------------------------------------------------------------------------------------------------------|--------------------------------|------------------------------------------------------------------------------------------------------------------------------------------------------------------|
|  |                                                                                                                                                                                                                                                          |                                | Taube 2002; CONSORT 2010; Baker 2009; Hayes 2013                                                                                                                 |
|  | Are the characteristics described for the base case population and subgroups analysed, including why they were chosen (histopathologic data, demographics etc.)?                                                                                         | <i>Patient Eligibility</i>     | Panis et al., 2016; Pepe et al., 2008; PROBE; Sauerbrei et al., 2014; REMARK; CONSORT 2010; STROBE; STARD; AGREE 2016; CHEERS; Maes 2015                         |
|  | Does the study match control subjects to case patients on suitable factors and describe matching criteria and number of exposed/unexposed?                                                                                                               | <i>Patient Eligibility</i>     | Pepe et al., 2008; PROBE STROBE                                                                                                                                  |
|  | Does the study describe distribution of disease severity in the cases (e.g. tumour stage)?                                                                                                                                                               | <i>Patient Eligibility</i>     | STARD; AGREE 2016                                                                                                                                                |
|  | Does the study interpret the results in the context of the pre-specified hypotheses and other relevant studies (i.e. pilot data)?                                                                                                                        | Pre-specified hypothesis       | Duffy & Sturgeon 2015; Paulovich et al., 2008                                                                                                                    |
|  | Does the study reference, or is a pilot study that has identified, the optimal sample collection and storage condition? Or, does the study include or use pilot measurements of biomarker's performance characteristics in the desired clinical setting? | Pre-specified hypothesis       | Sauerbrei et al., 2014; REMARK                                                                                                                                   |
|  | Is the population randomised?                                                                                                                                                                                                                            | <i>Randomisation/Blinding</i>  | Pepe et al., 2008; PROBE; Maes 2015                                                                                                                              |
|  | Is the method used to generate the random allocation sequence stated?                                                                                                                                                                                    | <i>Randomisation/Blinding</i>  | CONSORT 2010; ARRIVE                                                                                                                                             |
|  | Type of randomisation; are details of any restriction are clearly stated?                                                                                                                                                                                | <i>Randomisation/Blinding</i>  | CONSORT 2010; ARRIVE                                                                                                                                             |
|  | Is it stated who generated the random allocation sequence, enrolled participants, and assigned participants to interventions?                                                                                                                            | <i>Randomisation/Blinding</i>  | CONSORT 2010                                                                                                                                                     |
|  | Did all patients receive a reference standard (i.e., the equivalent gold standard test, if available)?                                                                                                                                                   | <i>Reference Standard</i>      | CONSORT                                                                                                                                                          |
|  | Did patients receive the same reference standard?                                                                                                                                                                                                        | <i>Reference Standard</i>      | Wang 2014                                                                                                                                                        |
|  | Was the interval between index test and reference standard stated, and if so, was the index test conducted within a reasonable time from the reference standard?                                                                                         | <i>Reference Standard</i>      | QUADAS2; Bossuyt et al., 2003; Maria Grazia Daidone, Nadia Zaffaroni, Vera Cappelletti; Wagner & Srivastava, 2012c; Mordente et al., 2008; Hristova & Chan, 2019 |
|  | Does the study use a reference standard, to assess outcome?                                                                                                                                                                                              | <i>Reference Standard</i>      | CONSORT                                                                                                                                                          |
|  | Is there explanation of the choice of sample size, for example, was it based on pilot data, or did the authors use a power calculation?                                                                                                                  | <i>Sample size Calculation</i> | Pepe et al., 2008; PROBE; Pavlou et al. 2013; ARRIVE                                                                                                             |

|  |                                                                                                                                                       |                                 |                                                                                                                                                                                                                                                                                                                                                                                                                                                                                                                                                                                                                                                                                                                                                                                                                                                                                         |
|--|-------------------------------------------------------------------------------------------------------------------------------------------------------|---------------------------------|-----------------------------------------------------------------------------------------------------------------------------------------------------------------------------------------------------------------------------------------------------------------------------------------------------------------------------------------------------------------------------------------------------------------------------------------------------------------------------------------------------------------------------------------------------------------------------------------------------------------------------------------------------------------------------------------------------------------------------------------------------------------------------------------------------------------------------------------------------------------------------------------|
|  |                                                                                                                                                       |                                 | Sauerbrei et al., 2014; REMARK; STROBE; STARD Baker 2009; Pepe et al., 2015; Conley & Taube 2004; Zolg 2006; Hritsova & Chan 2019; Costello et al.,2011;Conley & Taube 2004; Maes 2015                                                                                                                                                                                                                                                                                                                                                                                                                                                                                                                                                                                                                                                                                                  |
|  | Are details of sample size calculation stated?                                                                                                        | <i>Sample size Calculation</i>  | Hammond & Taube (2002)                                                                                                                                                                                                                                                                                                                                                                                                                                                                                                                                                                                                                                                                                                                                                                                                                                                                  |
|  | Were the methods for estimating or comparing measures of diagnostic accuracy stated? (Positive Predictive Value, Negative Predictive Value, Survival) | <i>Sensitivity/ specificity</i> | Cummings et al., 2008; George et al.,2008; Chau et al., 2009; Fuzery et al., 2013; Duffy & Sturgeon 2015; Pepe et al., 2008; PROBE;Chen et al., 2018; Riechl & Mikultis 2016; Volpe et al., 2018; Juarez-Hernandez et al., 2017;Shirodkar & Lokeshwar 2008; Hendriks et al., 2017; Silva 2015; Seregni et al., 2004; Tockman et al., 1992; Cho 2007; Montie & Meyers 1997; Locke et al., 2019; Schneider et al., 2015; Maruvada & Srivastava 2006; Poste et al., 2012; Donovan & Cordon-cardo 2013; Conley & Taube 2004; Helzlsouer 1994; Kvinnsland 1991; Diamandis 2012; Nicollete & sMiller 2003; Negm et al.,2002; Bast et al., 2005; Paulovich et al., 2008; Handy 2009; Pavlou et al., 2013; Maes 2015; Ali et al., 2018; Wang 2014; Yang et al., 2019; Landgren & Morgan 2014; Riechl & Mikultis 2016; Wentzensen et al., 2013; Baker 2009; Bast et al., 2005; Handy 2009; STARD |



|  |                                                                                                                                                                          |                                     |                                                                                                                                                                                                                                                                                                                                                                                                                                                                                                                                                                                                                                                                                                                                                                                                                                                                                         |
|--|--------------------------------------------------------------------------------------------------------------------------------------------------------------------------|-------------------------------------|-----------------------------------------------------------------------------------------------------------------------------------------------------------------------------------------------------------------------------------------------------------------------------------------------------------------------------------------------------------------------------------------------------------------------------------------------------------------------------------------------------------------------------------------------------------------------------------------------------------------------------------------------------------------------------------------------------------------------------------------------------------------------------------------------------------------------------------------------------------------------------------------|
|  | Was specificity and sensitivity stated?                                                                                                                                  | <i>Sensitivity/<br/>specificity</i> | Cummings et al., 2008; George et al.,2008; Chau et al., 2009; Fuzery et al., 2013; Duffy & Sturgeon 2015; Pepe et al., 2008; PROBE;Chen et al., 2018; Riechl & Mikultis 2016; Volpe et al., 2018; Juarez-Hernandez et al., 2017;Shirodkar & Lokeshwar 2008; Hendriks et al., 2017; Silva 2015; Seregni et al., 2004; Tockman et al., 1992; Cho 2007; Montie & Meyers 1997; Locke et al., 2019; Schneider et al., 2015; Maruvada & Srivastava 2006; Poste et al., 2012; Donovan & Cordon-cardo 2013; Conley & Taube 2004; Helzlsouer 1994; Kvinnsland 1991; Diamandis 2012; Nicollete & sMiller 2003; Negm et al.,2002; Bast et al., 2005; Paulovich et al., 2008; Handy 2009; Pavlou et al., 2013; Maes 2015; Ali et al., 2018; Wang 2014; Yang et al., 2019; Landgren & Morgan 2014; Riechl & Mikultis 2016; Wentzensen et al., 2013; Baker 2009; Bast et al., 2005; Handy 2009; STARD |
|  | Was the study designed to detect a specified effect size? Does the study give target power and effect size?                                                              | <i>Statistical Modelling</i>        | Taube et al., 2009; Handy 2009; Sauerbrei et al. 2014; REMARK                                                                                                                                                                                                                                                                                                                                                                                                                                                                                                                                                                                                                                                                                                                                                                                                                           |
|  | Did the authors recalibrate their initial model, upon study validation?                                                                                                  | <i>Statistical Modelling</i>        | SPIRIT                                                                                                                                                                                                                                                                                                                                                                                                                                                                                                                                                                                                                                                                                                                                                                                                                                                                                  |
|  | Does the study describe and give reasons for the specific type of decisional analytical model used? (Providing a figure to show model structure is strongly recommended) | <i>Statistical Modelling</i>        | REMARK; SQUIRE; SPIRIT                                                                                                                                                                                                                                                                                                                                                                                                                                                                                                                                                                                                                                                                                                                                                                                                                                                                  |
|  | Among reported results, does the study provide estimated effects, with confidence intervals?                                                                             | <i>Statistical Modelling</i>        | REMARK                                                                                                                                                                                                                                                                                                                                                                                                                                                                                                                                                                                                                                                                                                                                                                                                                                                                                  |

|                         |                                                                                                                                                                                                                                                                                                                                                        |                                 |                                                                                                                                                                                                                                |
|-------------------------|--------------------------------------------------------------------------------------------------------------------------------------------------------------------------------------------------------------------------------------------------------------------------------------------------------------------------------------------------------|---------------------------------|--------------------------------------------------------------------------------------------------------------------------------------------------------------------------------------------------------------------------------|
|                         | Does the study present univariable analyses showing the relation between the marker and outcome, with the estimated effect (e.g., hazard ratio and survival probability)? Does it provide similar analyses for all other variables being analysed? (For the effect of a tumour marker on a time-to-event outcome, a Kaplan-Meier plot is recommended.) | <i>Statistical Modelling</i>    | Sauerbrei et al. (2014) - REMARK                                                                                                                                                                                               |
|                         | For key multivariable analyses, are estimated effects (e.g., hazard ratio) reported with confidence intervals for the marker and, at least for the final model, all other variables in the model?                                                                                                                                                      | <i>Statistical Modelling</i>    | STARD                                                                                                                                                                                                                          |
|                         | If relevant, do the authors describe the reasons for the decisional analysis model used?                                                                                                                                                                                                                                                               | <i>Statistical Modelling</i>    | REMARK; SQUIRE; SPIRIT                                                                                                                                                                                                         |
|                         | Do the authors describe over-fitting data/variables, or subjectively are there too many variables?                                                                                                                                                                                                                                                     | <i>Statistical Modelling</i>    | George et al., 2008                                                                                                                                                                                                            |
|                         | Does the study use appropriate quality controls for statistical analysis, e.g., have the authors collaborated with an experienced biostatistician?                                                                                                                                                                                                     | <i>Statistical Modelling</i>    | Pavlou et al., 2013; Ewaisha et al., 2015                                                                                                                                                                                      |
|                         | Does the study present a summary of trial design (including allocation ratio/methods/results/conclusions), states registration number and name of trial registry and where the full trial protocol can be accessed, if available?                                                                                                                      | <i>Trial Design description</i> | CONSORT 2010; ARRIVE; CONSORT 2010; STARD                                                                                                                                                                                      |
|                         | Did the authors explain all important adverse events in the study? Have they explained modifications to the experimental protocol upon study commencement?                                                                                                                                                                                             | <i>Adverse events</i>           | ARRIVE<br>CONSORT (2010)                                                                                                                                                                                                       |
| <b>CLINICAL UTILITY</b> | Does the biomarker have approval for clinical use (e.g. from NICE or FDA)?                                                                                                                                                                                                                                                                             | <i>Authority Approval</i>       | Costello et al., 2011; Hayes 2013; Pepe et al., 2015; Ewaisha et al., 2015                                                                                                                                                     |
|                         | Subjectively, might this biomarker result in cost-saving changes to clinical practice such as reduced hospital admissions, reduced chemotherapy or a reduction in more expensive diagnostic tests/treatments?                                                                                                                                          | <i>Cost-effectiveness</i>       | CHEERS; Taube et al., 2009                                                                                                                                                                                                     |
|                         | Does the study discuss costs and strategic trade-offs (including opportunity costs)?                                                                                                                                                                                                                                                                   | <i>Cost-effectiveness</i>       | Taube et al., 2009; Wang 2014; Shirodkar & Lokeshwar 2008; Hendriks et al., 2017; Locke et al., 2019; Schneider et al., 2015; Helzlsouer 1994; Negm et al., 2002; Handy 2009; Yang et al., 2019; Monaghan et al., 2018; CHEERS |

|  |                                                                                                                                                                                                                                                                                                                                                |                             |                                                                                                                                                                   |
|--|------------------------------------------------------------------------------------------------------------------------------------------------------------------------------------------------------------------------------------------------------------------------------------------------------------------------------------------------|-----------------------------|-------------------------------------------------------------------------------------------------------------------------------------------------------------------|
|  | Decisional Analysis- subjectively, might the biomarker influence clinician decision making?                                                                                                                                                                                                                                                    | <i>Decisional Analysis</i>  | Poste et al., 2012; Hayes et al., 1996; TMUGS; Taube 2009; Shirodkar & Lokeshwar 2008; Taube et al., 2005, Sauerbrei et al., 2014; REMARK, Sauerbrei et al., 2014 |
|  | If relevant, does the study include ethical review permissions, relevant licences for in vivo animal work (e.g., Animal [Scientific Procedures] Act 1986), and national or institutional guidelines for the care and use of animals, that cover the research? Ethics for patient sampling and any interventions should also be clearly stated. | <i>Ethics</i>               | ARRIVE &                                                                                                                                                          |
|  | Can the biomarker be incorporated in routine care workflow / can it be implemented in clinical practice?                                                                                                                                                                                                                                       | <i>Feasibility</i>          | Hammond & Taube 2002; Taube 2009; Wang 2014                                                                                                                       |
|  | Does it involve High-Throughput techniques?                                                                                                                                                                                                                                                                                                    | <i>Feasibility</i>          | Paulovitch et al., 2008; Sturgeon et al., 2010; Hritsova & Chan 2019; Rimza et al., 2016; Modur et al., 2013; Helzlsouer 1994                                     |
|  | Is the biomarker assay automated? (If it requires a lot of work force, score 0)                                                                                                                                                                                                                                                                | <i>Feasibility</i>          | SQUIRE                                                                                                                                                            |
|  | Does the study state sources of funding and other support (such as supply of drugs), role of funders and provide an explicit statement that all group members have declared whether they have competing interest?                                                                                                                              | <i>Funding</i>              | CONSORT (2010); STROBE; STARD; AGREE (2016); ARRIVE; AGREE (2016); CHEERS                                                                                         |
|  | Are the all-important harms or unintended effects in each group are stated?                                                                                                                                                                                                                                                                    | <i>Harms and Toxicology</i> | Miquel-Cases et al., 2017; Negm et al., 2002                                                                                                                      |
|  | If relevant, is the toxicology of the biomarker target being tested explained?                                                                                                                                                                                                                                                                 | <i>Harms and Toxicology</i> | SQUIRE                                                                                                                                                            |
|  | Are Human Factors, such as the invasiveness of sample collection or acceptance of the test by clinicians, considered or discussed?                                                                                                                                                                                                             | <i>Human Factor</i>         | STARD, George, 2008; Hristova & Chan, 2019; Pollack et al., 1998; Sturgeon 2010                                                                                   |
|  | Was sample collection non-invasive?                                                                                                                                                                                                                                                                                                            | <i>Invasiveness</i>         | Helzlsouer 1994; Silva 2015; Wang 2014; Tan et al., 2009; Shirodkar & Lokeshwar 2008                                                                              |
|  | Were specimens collected prospectively?                                                                                                                                                                                                                                                                                                        | <i>Study Type</i>           | Poste et al., 2012; Pepe et al., 2008; PROBE; Hammond & Taube 2002; CONSORT 2010; Baker 2009; Hayes 2013, STARD                                                   |

|  |                                                                                                                                                                                                                                                                                       |                |                                                                                                                                                                                                                                                                               |
|--|---------------------------------------------------------------------------------------------------------------------------------------------------------------------------------------------------------------------------------------------------------------------------------------|----------------|-------------------------------------------------------------------------------------------------------------------------------------------------------------------------------------------------------------------------------------------------------------------------------|
|  | Does the study acknowledge limitations, e.g., does it take into consideration benefits/harms/study limitations?                                                                                                                                                                       | <i>Utility</i> | CONSORT 2010; ARRIVE; CONSORT 2010; STARD                                                                                                                                                                                                                                     |
|  | Is there discussion regarding who will benefit from the biomarker, what the intended utility of biomarkers is and/or whether it can be used on both high and low income individuals?                                                                                                  | <i>Utility</i> | STARD (intro); Celis et al., 2005; George 2008; Chau et al., 2009; Sturgeon et al., 2010; Wagner & Srivastava, 2012c; Daniel F Hayes, 2013; Campbell, 2016; Miquel-Cases et al., 2017; Salgado et al., 2017; Hristova & Chan, 2019                                            |
|  | Can the findings of this study be translated to other species including humans?                                                                                                                                                                                                       | <i>Utility</i> | Schneider et al., 2015; STARD<br>Taube et al., 2009; Hayes 2014;<br>Hendriks et al., 2017;<br>Locke et al., 2019; Handy 2009;<br>Pavlou et al., 2013;<br>Taube 2009; Sargent & Allegra 2002;<br>Tockman et al., 1992;<br>Sauerbrei et al., 2014;<br>REMARK; Negm et al., 2002 |
|  | Does the study define a specific algorithm to assess biomarker outcome, in addition to other information, including clinical information and other available markers etc?                                                                                                             | <i>Utility</i> | Schneider et al., 2015; STARD<br>Taube et al., 2009; Hayes 2014;<br>Hendriks et al., 2017;<br>Locke et al., 2019; Handy 2009;<br>Pavlou et al., 2013;<br>Taube 2009; Sargent & Allegra 2002;<br>Tockman et al., 1992;<br>Sauerbrei et al., 2014;<br>REMARK; Negm et al., 2003 |
|  | Is the biomarker linked with a current health policy/health practice?                                                                                                                                                                                                                 | <i>Utility</i> | AGREE 2016; Poste et al., 2012                                                                                                                                                                                                                                                |
|  | Regarding the results and discussion, are observed associations between outcomes, interventions, and relevant contextual elements clearly stated? Are unintended consequences such as unexpected benefits, problems, failures, or costs associated with the intervention(s) reported? | <i>Utility</i> | CONSORT                                                                                                                                                                                                                                                                       |

|  |                                                                                                                                                                                                  |                |                                                                                                                                                                       |
|--|--------------------------------------------------------------------------------------------------------------------------------------------------------------------------------------------------|----------------|-----------------------------------------------------------------------------------------------------------------------------------------------------------------------|
|  | Is biospecimen collection amenable to pre and post-operative treatment sampling? (e.g. Biopsy no, breath/blood yes)                                                                              | <i>Utility</i> | G.F., J., H., T., & A., 2012                                                                                                                                          |
|  | Does the study specify the time period from which cases were taken and/or specifies median/end of follow-up period?                                                                              | <i>Utility</i> | Sauerbrei et al., 2014; REMARK; CONSORT 2010; STROBE                                                                                                                  |
|  | Does the study evaluate increment in performance when biomarker is combined with current relevant methods?                                                                                       | <i>Utility</i> | Pepe et al., 2008; PROBE                                                                                                                                              |
|  | Does the study state if samples were obtained and processed in a way similar to what will occur in a clinical setting?                                                                           | <i>Utility</i> | Poste et al., 2012; STTaube et al., 2009; Sauerbrei et al., 2014; REMARK; CONSORT 2010; STROBE; STARD; ARRIVE; CHEERS; Baker (2009); STROBE;ARRIVEROBE; STARD; CHEERS |
|  | Does the study address if the biomarker use can be beneficial outside the clinical trial setting or does the study address if the biomarker results can be generalised outside a clinical trial? | <i>Utility</i> | Poste et al., 2012; STTaube et al., 2009; Sauerbrei et al., 2014; REMARK; CONSORT 2010; STROBE; STARD; ARRIVE; CHEERS; Baker (2009); STROBE;ARRIVE; STARD; CHEERS     |

89

90

91

92

93

94

95

96  
97  
98  
99  
100  
101  
102  
103  
104  
105  
106  
107  
108

| <b>Attribute Category</b> | <b>Number of Attribute-groups assessed (n) *</b> | <b>% of attribute-groups in which &lt;75% consensus was achieved (n)</b> |
|---------------------------|--------------------------------------------------|--------------------------------------------------------------------------|
| Analytical Validity       | 13                                               | 92.31 (12)                                                               |
| Clinical Validity         | 16                                               | 93.75 (15)                                                               |
| Clinical Utility          | 17                                               | 70.59 (12)                                                               |
| Rationale                 | 5                                                | 80 (4)                                                                   |
| <b>All Categories</b>     | <b>51</b>                                        | <b>84.31 (43)</b>                                                        |

\*Detailed Attributes are found in **additional file: Table S7**. Attributes were grouped according to theme to simplify the questions and allow the participants to answer the question more efficiently.

109  
110  
111  
112

| <b>Category</b> | <b>Characteristics</b>                                                                                   | <b>Round 1</b> | <b>Round 2</b> |
|-----------------|----------------------------------------------------------------------------------------------------------|----------------|----------------|
| AV              | Detailed description of experimental animals if used (i.e. strain, sex, weight & relevant health status) | 66.67          | 66.67          |
| CV              | Randomisation: Is the population randomised and in what way? How is the random allocation generated?     | 70.59          | 80.56          |
| CU              | Can the biomarker result be delivered via machine learning?                                              | 43.16          | 25             |
| CU              | Scalability: High Throughput technique                                                                   | 66.67          | 80.56          |
| CU              | Can the findings of the study be translated to other species including humans?                           | 64.71          | 47.22          |
| CU              | Affordability for the patient. Is there a reimbursement?                                                 | 47.06          | 36.11          |
| CU              | Can the biomarker be applied to assess the health of a close family member?                              | 43.14          | 30.56          |
| Rationale       | Applicable to a wide cohort                                                                              | 70.59          | 63.89          |

113

114

115

**Additional File Table S9: Table showing the attribute-categories identified as significantly different between successful and stalled breast cancer biomarkers, using Man Whitney- U test and binary logistic regression\***

|                                                 | Successful   |             | Stalled      |             | Mann-Whitney      |                 | Binary Logistic Regression (95% C.I.) |             |             |
|-------------------------------------------------|--------------|-------------|--------------|-------------|-------------------|-----------------|---------------------------------------|-------------|-------------|
|                                                 | Mean         | SEM         | Mean         | SEM         | P-Value           | P value Summary | Sig.                                  | Lower       | Upper       |
| <b>Adverse events</b>                           | <b>33.33</b> | <b>4.62</b> | <b>17.07</b> | <b>4.18</b> | <b>0.02</b>       | <b>*</b>        | <b>0.01</b>                           | <b>0.98</b> | <b>1.00</b> |
| <b>Assay Validation- Variability/%CV</b>        | <b>49.44</b> | <b>1.89</b> | <b>34.44</b> | <b>1.39</b> | <b>&lt;0.0001</b> | <b>****</b>     | <b>0.000</b>                          | <b>0.94</b> | <b>0.97</b> |
| <b>Assay Validation- Method Optimisation</b>    | <b>47.87</b> | <b>5.18</b> | <b>34.78</b> | <b>4.07</b> | <b>0.046</b>      | <b>*</b>        | <b>0.047</b>                          | <b>0.99</b> | <b>1</b>    |
| <b>Biospecimen Inclusion/Exclusion Criteria</b> | <b>86.67</b> | <b>3.33</b> | <b>54.88</b> | <b>5.53</b> | <b>&lt;0.0001</b> | <b>****</b>     | <b>0.00</b>                           | <b>0.98</b> | <b>0.99</b> |
| <b>Methodology Details</b>                      | <b>32.38</b> | <b>4.59</b> | <b>19.51</b> | <b>4.40</b> | <b>0.07</b>       | <b>NS</b>       | <b>0.05</b>                           | <b>0.99</b> | <b>1.00</b> |
| <b>Patient Eligibility</b>                      | <b>75.77</b> | <b>1.74</b> | <b>57.99</b> | <b>2.91</b> | <b>&lt;0.0001</b> | <b>****</b>     | <b>0.00</b>                           | <b>0.95</b> | <b>0.98</b> |
| <b>Randomisation/Blinding</b>                   | <b>15.48</b> | <b>2.82</b> | <b>4.573</b> | <b>1.38</b> | <b>0.01</b>       | <b>**</b>       | <b>0.00</b>                           | <b>0.96</b> | <b>0.99</b> |
| <b>Reference Standard</b>                       | <b>13.57</b> | <b>2.14</b> | <b>19.51</b> | <b>2.46</b> | <b>0.02</b>       | <b>*</b>        | <b>0.05</b>                           | <b>1.00</b> | <b>1.03</b> |

\*32 Binary Regression Analysis were conducted. The total sub-categories were 48. We excluded: i) details of experimental animal reporting which was removed from the Delphi Round 2 (n=1) i) rationale related sub-attributes (n=4), ii) Clinical Utility attributes prior Clinical Utility score amendment methodology (n=11\_see **additional file: methods**).

116

117

118

119

120

121  
122  
123

**Additional File Table S10: Table showing attribute-categories identified as significantly different between successful and stalled CRC biomarkers, using Man Whitney- U test and binary logistic regression**

|                                                 | Successful  |       | Stalled |       | Mann Whitney U test |      | Binary logistic Regression |                    |       |
|-------------------------------------------------|-------------|-------|---------|-------|---------------------|------|----------------------------|--------------------|-------|
|                                                 | Average (%) | STDEV | Average | STDEV | P-Value             |      | Sig.                       | 95% C.I.for EXP(B) |       |
|                                                 |             |       |         |       |                     |      |                            | Lower              | Upper |
| <b>Adverse events</b>                           | 56.39       | 4.31  | 35.51   | 4.30  | 0.0006              | ***  | 0.001                      | 0.987              | 0.996 |
| <b>Assay Validation (non-compliance)</b>        | 30.16       | 1.83  | 23.78   | 1.48  | 0.0271              | *    | 0.008                      | 0.971              | 0.996 |
| <b>Assay Validation</b>                         | 83.46       | 3.23  | 62.32   | 4.14  | <0.0001             | **** | 0.000                      | 0.983              | 0.995 |
| <b>Biospecimen Inclusion/Exclusion Criteria</b> | 60.90       | 4.25  | 47.10   | 4.26  | 0.023               | *    | 0.023                      | 0.990              | 0.999 |
| <b>Cell Culture</b>                             | 0.75        | 0.75  | 14.25   | 2.11  | <0.0001             | **** | 0.000                      | 1.034              | 1.105 |
| <b>Experimental Procedure Description</b>       | 97.74       | 1.29  | 91.30   | 2.41  | 0.0208              | *    | 0.031                      | 0.973              | 0.999 |
| <b>Harms and Toxicology</b>                     | 58.27       | 3.62  | 30.07   | 3.19  | <0.0001             | **** | 0.000                      | 0.977              | 0.989 |
| <b>Intervention</b>                             | 95.49       | 1.73  | 64.49   | 3.82  | <0.0001             | **** | 0.000                      | 0.962              | 0.982 |
| <b>Mechanism of stabilization/</b>              | 35.96       | 2.18  | 39.31   | 2.74  | <0.0001             | **** | 0.000                      | 1.010              | 1.035 |
| <b>Patient Eligibility</b>                      | 61.07       | 4.25  | 41.10   | 4.26  | 0.001               | ***  | 0.001                      | 0.967              | 0.991 |
| <b>Reference Standard</b>                       | 18.42       | 2.69  | 7.07    | 1.61  | 0.0007              | ***  | 0.001                      | 0.972              | 0.992 |

\*32 Binary Regression Analysis were conducted. The total sub-categories were 48. We excluded: i) details of experimental animal reporting which was removed from the Delphi Round 2 (n=1) i) rationale related sub-attributes (n=4), ii) Clinical Utility attributes prior Clinical Utility score amendment methodology (n=11\_ see **Additional file: methods**).

124  
125  
126  
127  
128  
129  
130  
131  
132



**Additional File Table S11: Table indicating the median rank for each subcategory (1-5), in Analytical Validity, Clinical Validity, Clinical Utility and Rationale for the seven indicated biomarker types (n=7).**

|                     |                                                                                                             | Diagnostic Biomarker | Response Biomarker | Predictive Biomarker | Recurrence Biomarker | Therapeutic Biomarker | Safety Biomarker | Pharmacodynamic Biomarker |
|---------------------|-------------------------------------------------------------------------------------------------------------|----------------------|--------------------|----------------------|----------------------|-----------------------|------------------|---------------------------|
| ANALYTICAL VALIDITY | 1) Assay validation                                                                                         | 1                    | 1                  | 1                    | 1                    | 1                     | 1                | 1                         |
|                     | 2) Detailed description of experimental animals                                                             | 4                    | 4                  | 4                    | 5                    | 4                     | 4                | 4                         |
|                     | 3) Detailed description of biospecimen storage & shipping                                                   | 3                    | 3                  | 4                    | 3.5                  | 3                     | 3                | 3                         |
|                     | 4) Detailed description of biospecimen source and collection                                                | 2                    | 2                  | 3                    | 2                    | 2                     | 3                | 3                         |
|                     | 5) Details of sample-pre processing                                                                         | 3                    | 3                  | 3                    | 2                    | 2                     | 3                | 3                         |
| CLINICAL VALIDITY   | 1) Participant eligibility                                                                                  | 2                    | 2                  | 2                    | 2                    | 2                     | 2                | 3                         |
|                     | 2) Experimental Outcomes, adverse events, missing data or modifications to experimental protocol            | 4                    | 4                  | 4                    | 3                    | 3                     | 3                | 3                         |
|                     | 3) Analysis: Were the methods for estimating or comparing measures of diagnostic accuracy stated            | 2.5                  | 2                  | 3                    | 3                    | 3                     | 3                | 3                         |
|                     | 4) Experimental design: i.e. appropriate reference standard, sample size calculation etc                    | 2                    | 2                  | 2                    | 2                    | 2                     | 2                | 2                         |
|                     | 5) Statistical analysis and Analytical Modelling                                                            | 3                    | 3                  | 3                    | 3                    | 3                     | 3                | 3                         |
| CLINICAL UTILITY    | 1) Usefulness/ Impact of the project on people and systems                                                  | 2                    | 1.5                | 2                    | 2                    | 2                     | 2                | 2.5                       |
|                     | 2) Regulatory Authority/Ethical Approval & Harms and Toxicology                                             | 4                    | 4                  | 4                    | 4                    | 4                     | 3                | 3                         |
|                     | 3) Human Factors                                                                                            | 3                    | 3                  | 3                    | 3                    | 3                     | 3                | 3                         |
|                     | 4) Cost effective for both hospital and patients                                                            | 3.5                  | 4                  | 4                    | 4                    | 4                     | 4                | 4                         |
|                     | 5) Can the test be easily adopted in a clinical setting?                                                    | 2                    | 2                  | 2                    | 2                    | 2                     | 2                | 2                         |
| RATIONALE           | 1) Identification of a disease of unmet need                                                                | 1.5                  | 3                  | 2                    | 3                    | 2                     | 3                | 3                         |
|                     | 2) Is there an existing biomarker test in current practice? Is there a need for an improved biomarker test? | 3                    | 3                  | 2.5                  | 2                    | 2                     | 3                | 3                         |
|                     | 3) Exploratory or hypothesis driven biomarker discovery approach                                            | 4                    | 3                  | 3                    | 3.5                  | 4                     | 3                | 3                         |
|                     | 4) Applicable to a wide cohort                                                                              | 3                    | 3                  | 2                    | 3                    | 3                     | 2                | 2                         |
|                     | 5) Identification of a biomarker type which is most useful for the disease of interest                      | 2                    | 2                  | 2                    | 2                    | 2                     | 2                | 2                         |

**Additional File Table S12: Cox Regression Model for unweighted, weighted, and weighted top 3 categories, Breast Cancer Biomarker scores.**

|              |       | SE     | Sig.   | Exp(B) | 95.0% CI for Exp(B) |       |
|--------------|-------|--------|--------|--------|---------------------|-------|
|              |       |        |        |        | Lower               | Upper |
| Unweighted   | CV1   | 0.007  | <0.00  | 0.959  | 0.945               | 0.973 |
|              | CV2   | 0.008  | 0.845  | 0.998  | 0.983               | 1.014 |
|              | CV3   | 0.008  | 0.87   | 1.014  | 0.998               | 1.029 |
|              | CV4   | 0.014  | 0.669  | 0.994  | 0.967               | 1.022 |
|              | CV5   | 0.011  | 0.068  | 1.021  | 0.998               | 1.043 |
|              |       |        |        |        |                     |       |
|              | CU1   | 0.16   | 0.957  | 0.999  | 0.969               | 1.031 |
|              | CU2   | 0.007  | <0.000 | 0.966  | 0.952               | 0.98  |
|              | CU3   | 0.014  | 0.209  | 1.017  | 0.99                | 1.045 |
|              | CU4   | 0.006  | 0.234  | 0.993  | 0.982               | 1.005 |
|              | CU5   | 0.021  | 0.85   | 1.004  | 0.963               | 1.046 |
|              |       |        |        |        |                     |       |
|              | AV1   | 0.13   | 0.025  | 0.972  | 0.948               | 0.996 |
|              | AV2   | 0.021  | 0.052  | 1.043  | 1                   | 1.087 |
|              | AV3   | 0.014  | 0.105  | 1.023  | 0.995               | 1.053 |
|              | AV4   | 0.015  | 0.217  | 0.982  | 0.954               | 1.011 |
|              | AV5   | 0.009  | 0.376  | 0.992  | 0.976               | 1.009 |
|              |       |        |        |        |                     |       |
|              | AV    | 0.033  | 0.578  | 0.981  | 0.919               | 1.048 |
|              | CV    | 0.033  | 0.714  | 1.012  | 0.949               | 1.079 |
| Amended CU   | 0.028 | 0.039  | 0.943  | 0.893  | 0.997               |       |
| TS           | 0.19  | >0.000 | 0.901  | 0.869  | 0.935               |       |
|              |       |        |        |        |                     |       |
| Weighted-All | CV1   | 0.009  | <0.000 | 0.95   | 0.933               | 0.967 |
|              | CV2   | 0.015  | 0.462  | 1.011  | 0.981               | 1.042 |
|              | CV3   | 0.011  | 0.136  | 1.017  | 0.995               | 1.04  |
|              | CV4   | 0.018  | 0.656  | 0.992  | 0.957               | 1.028 |
|              | CV5   | 0.018  | 0.08   | 1.031  | 0.996               | 1.068 |
|              |       |        |        |        |                     |       |
|              | CU1   | 0.017  | 0.873  | 0.997  | 0.965               | 1.031 |
|              | CU2   | 0.019  | <0.00  | 0.914  | 0.88                | 0.949 |
|              | CU3   | 0.022  | 0.181  | 1.029  | 0.987               | 1.074 |
|              | CU4   | 0.014  | 0.466  | 0.99   | 0.963               | 1.017 |
|              | CU5   | 0.024  | 0.814  | 1.006  | 0.959               | 1.054 |
|              |       |        |        |        |                     |       |
|              | AV1   | 0.012  | 0.052  | 0.977  | 0.954               | 1     |
|              | AV2   | 0.052  | 0.473  | 1.038  | 0.938               | 1.148 |
|              | AV3   | 0.032  | 0.602  | 1.017  | 0.954               | 1.084 |
| AV4          | 0.019 | 0.612  | 0.99   | 0.954  | 1.028               |       |

134  
135  
136  
137  
138  
139  
140  
141  
142  
143  
144  
145  
146  
147  
148  
149  
150  
151  
152  
153  
154  
155  
156  
157  
158  
159  
160  
161  
162  
163  
164

|  |               |       |        |       |       |       |
|--|---------------|-------|--------|-------|-------|-------|
|  | AV5           | 0.012 | 0.427  | 0.99  | 0.968 | 1.015 |
|  |               |       |        |       |       |       |
|  | AV            | 0.023 | 0.616  | 0.988 | 0.944 | 1.035 |
|  | CV            | 0.26  | 0.263  | 0.971 | 0.923 | 1.022 |
|  | Amended<br>CU | 0.021 | 0.001  | 0.933 | 0.896 | 0.972 |
|  | TS            | 0.23  | >0.000 | 0.887 | 0.848 | 0.928 |
|  |               |       |        |       |       |       |
|  | CV1           | 0.008 | 0.004  | 0.953 | 0.937 | 0.969 |
|  | CV2           |       |        |       |       |       |
|  | CV3           | 0.011 | 0.172  | 1.015 | 0.994 | 1.038 |
|  | CV4           | 0.018 | 0.689  | 0.992 | 0.958 | 1.128 |
|  | CV5           | 0.017 | 0.054  | 1.034 | 0.999 | 1.07  |
|  |               |       |        |       |       |       |
|  | CU1           | 0.016 | 0.522  | 1.01  | 0.979 | 1.043 |
|  | CU2           |       |        |       |       |       |
|  | CU3           | 0.02  | 0.66   | 1.009 | 0.97  | 1.074 |
|  | CU4           | 0.022 | 0.172  | 1.03  | 0.987 | 1.076 |
|  | CU5           |       |        |       |       |       |
|  |               |       |        |       |       |       |
|  | AV1           | 0.13  | 0.524  | 0.992 | 0.955 | 1.001 |
|  | AV2           |       |        |       |       |       |
|  | AV3           | 0.32  | 0.564  | 1.006 | 0.957 | 1.084 |
|  | AV4           | 0.021 | 0.564  | 0.990 | 0.953 | 1.028 |
|  | AV5           | 0.013 | 0.426  | 0.990 | 0.966 | 1.015 |
|  |               |       |        |       |       |       |
|  | AV            | 0.22  | 0.597  | 0.908 | 0.946 | 1.033 |
|  | CV            | 0.18  | 0.181  | 0.976 | 0.942 | 1.011 |
|  | Amended<br>CU | 0.020 | 0.001  | 0.934 | 0.698 | 0.972 |
|  | TS            | 0.019 | >0.000 | 0.9   | 0.887 | 0.937 |
|  |               |       |        |       |       |       |

**Additional File Table S13: Cox Regression Model for unweighted, weighted, and weighted top 3 categories, CRC Biomarker scores.**

|              |            | SE    | Sig.  | Exp(B) | 95.0% CI for Exp(B) |          |
|--------------|------------|-------|-------|--------|---------------------|----------|
|              |            |       |       |        | Lower               | Upper    |
| Unweighted   | AV1        | 0.005 | 0.767 | 1.001  | 0.992               | 1.011    |
|              | AV2        | 0.003 | 0.000 | 1.021  | 1.016               | 1.026    |
|              | AV3        | 0.018 | 0.453 | 0.987  | 0.953               | 1.022    |
|              | AV4        | 0.010 | 0.426 | 1.008  | 0.989               | 1.027    |
|              | AV5        | 0.005 | 0.774 | 1.001  | 0.992               | 1.011    |
|              |            |       |       |        |                     |          |
|              | CV1        | 0.004 | 0.002 | 0.988  | 0.981               | 0.996    |
|              | CV2        | 0.004 | 0.034 | 1.010  | 1.001               | 1.018    |
|              | CV3        | 0.052 | 0.388 | 1.046  | 0.945               | 1.157    |
|              | CV4        | 0.011 | 0.247 | 0.988  | 0.967               | 1.009    |
|              | CV5        | 0.007 | 0.025 | 0.984  | 0.971               | 0.998    |
|              |            |       |       |        |                     |          |
|              | CU1        | 0.018 | 0.091 | 1.030  | 0.995               | 1.067    |
|              | CU2        | 0.004 | 0.001 | 0.987  | 0.979               | 0.995    |
|              | CU3        | 3.814 | 0.958 | 0.817  | 0.000               | 1440.305 |
|              | CU4        | 0.003 | 0.000 | 0.985  | 0.979               | 0.991    |
|              | CU5        | 0.008 | 0.307 | 0.992  | 0.976               | 1.008    |
|              |            |       |       |        |                     |          |
|              | Amended CU | 0.005 | 0.000 | 0.959  | 0.949               | 0.969    |
|              | AV         | 0.011 | 0.001 | 1.040  | 1.017               | 1.064    |
| CV           | 0.009      | 0.343 | 0.991 | 0.974  | 1.009               |          |
| Total Scores | 0.010      | 0.000 | 0.936 | 0.918  | 0.954               |          |
| Weighted-All | AV1        | 0.005 | 0.767 | 1.001  | 0.992               | 1.011    |
|              | AV2        | 0.007 | 0.000 | 1.053  | 1.040               | 1.067    |
|              | AV3        | 0.035 | 0.453 | 0.974  | 0.909               | 1.043    |
|              | AV4        | 0.014 | 0.426 | 1.011  | 0.984               | 1.038    |
|              | AV5        | 0.008 | 0.774 | 1.002  | 0.986               | 1.019    |
|              |            |       |       |        |                     |          |
|              | CV1        | 0.005 | 0.002 | 0.985  | 0.976               | 0.994    |
|              | CV2        | 0.011 | 0.034 | 1.024  | 1.002               | 1.047    |
|              | CV3        | 0.086 | 0.388 | 1.077  | 0.910               | 1.276    |
|              | CV4        | 0.013 | 0.247 | 0.985  | 0.959               | 1.011    |
|              | CV5        | 0.012 | 0.025 | 0.974  | 0.952               | 0.997    |
|              |            |       |       |        |                     |          |
|              | CU1        | 0.020 | 0.091 | 1.034  | 0.995               | 1.074    |
|              | CU2        | 0.010 | 0.001 | 0.968  | 0.949               | 0.987    |
|              | CU3        | 6.356 | 0.958 | 0.714  | 0.000               | #####    |
|              | CU4        | 0.008 | 0.000 | 0.964  | 0.949               | 0.978    |
|              | CU5        | 0.010 | 0.307 | 0.990  | 0.970               | 1.010    |
|              |            |       |       |        |                     |          |
| Amended CU   | 0.005      | 0.000 | 0.958 | 0.948  | 0.968               |          |
| AV           | 0.019      | 0.034 | 1.040 | 1.003  | 1.079               |          |

|                           |              |       |       |       |       |           |
|---------------------------|--------------|-------|-------|-------|-------|-----------|
|                           | CV           | 0.015 | 0.362 | 0.986 | 0.958 | 1.016     |
|                           |              |       |       |       |       |           |
|                           | Total Scores | 0.012 | 0.000 | 0.913 | 0.892 | 0.934     |
| Top 3 Weighted Categories | AV1          | 0.004 | 0.752 | 1.001 | 0.993 | 1.010     |
|                           | AV3          | 0.035 | 0.867 | 1.006 | 0.939 | 1.078     |
|                           | AV4          | 0.014 | 0.171 | 1.020 | 0.992 | 1.049     |
|                           | AV5          | 0.009 | 0.353 | 0.992 | 0.976 | 1.009     |
|                           |              |       |       |       |       |           |
|                           | CV1          | 0.004 | 0.008 | 0.988 | 0.980 | 0.997     |
|                           | CV3          | 0.074 | 0.328 | 1.075 | 0.930 | 1.243     |
|                           | CV4          | 0.013 | 0.414 | 0.989 | 0.964 | 1.015     |
|                           | CV5          | 0.011 | 0.116 | 0.983 | 0.962 | 1.004     |
|                           |              |       |       |       |       |           |
|                           | CU1          | 0.016 | 0.354 | 1.015 | 0.984 | 1.046     |
|                           | CU3          | 5.921 | 0.956 | 0.719 | 0.000 | 78890.474 |
|                           | CU5          | 0.010 | 0.007 | 0.975 | 0.956 | 0.993     |
|                           |              |       |       |       |       |           |
|                           | Amended CU   | 0.006 | 0.000 | 0.956 | 0.946 | 0.966     |
|                           | AV           | 0.014 | 0.603 | 0.993 | 0.965 | 1.021     |
|                           | CV           | 0.015 | 0.793 | 0.996 | 0.967 | 1.026     |
|                           |              |       |       |       |       |           |
| Total Scores              | 0.011        | 0.000 | 0.910 | 0.889 | 0.930 |           |

165  
166  
167  
168  
169  
170  
171  
172  
173  
174  
175  
176  
177  
178  
179  
180

181  
182  
183  
184  
185  
186  
187  
188  
189  
190  
191  
192  
193  
194  
195  
196  
197  
198  
199

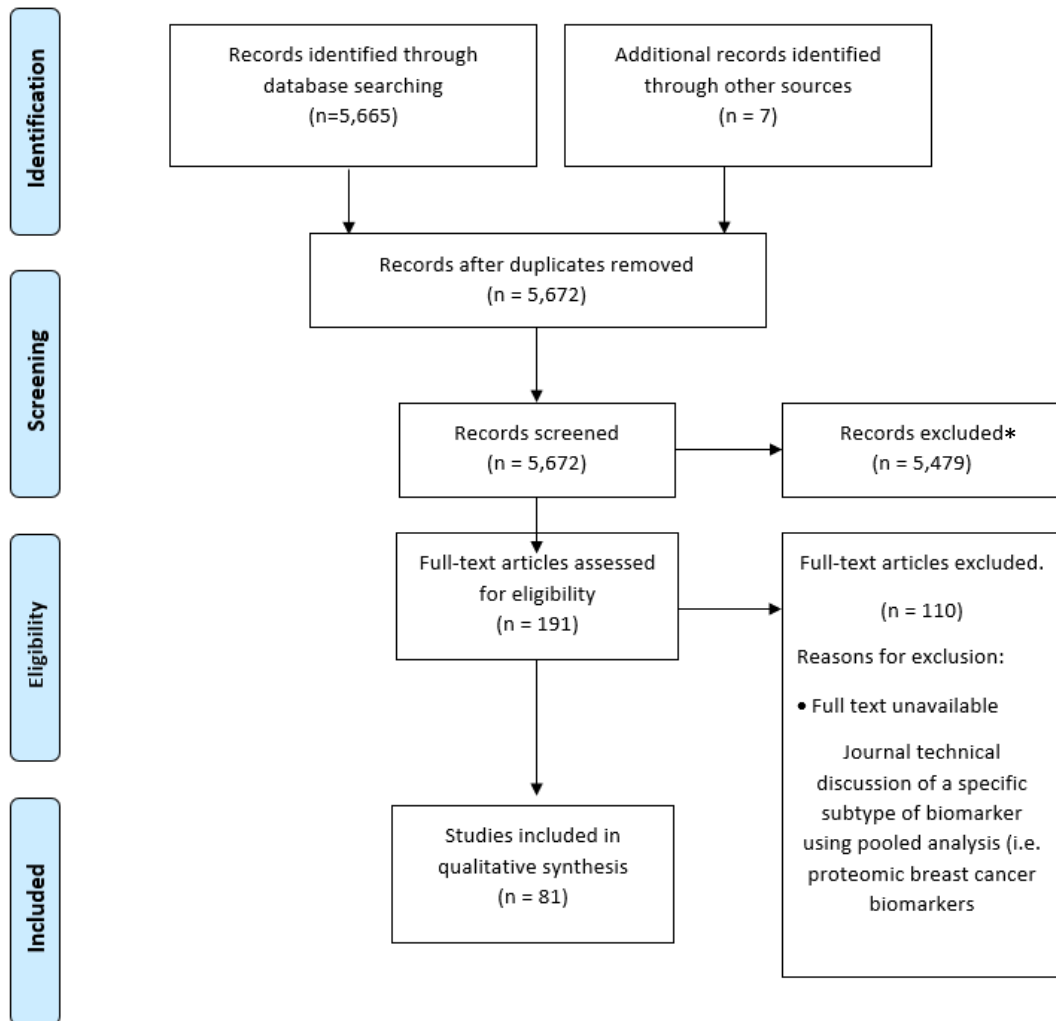

**Additional File Figure S1: PRISMA illustrating study selection for Biomarker criteria checklist.** \* Reasons for exclusion include: not written in English Language, conference abstracts, technical biomarker papers, molecular biology primary studies.

200  
201  
202  
203  
204

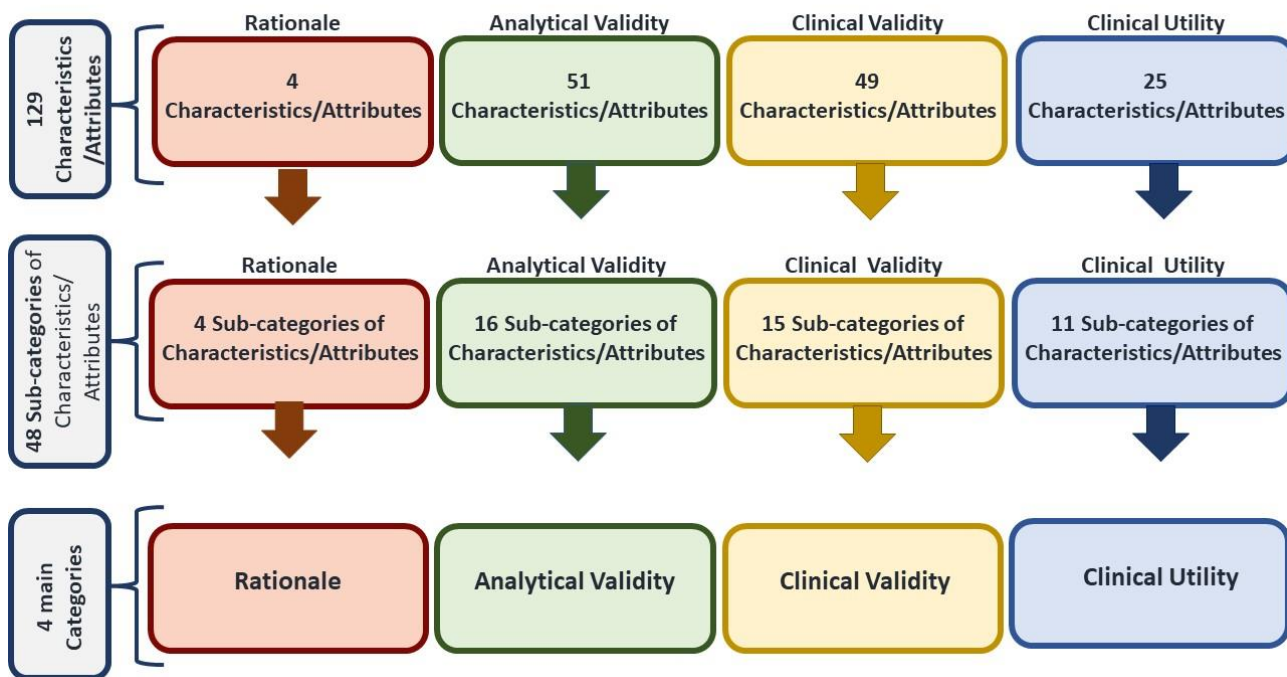

**Additional File Figure S2: Categorisation/Grouping of Biomarker toolkit Characteristics.** Biomarker characteristics were initially grouped into 48 sub-categories, according to theme, which then merged into four main categories.

205

206

207

208

209

210

211

212

213

214

215

216

217

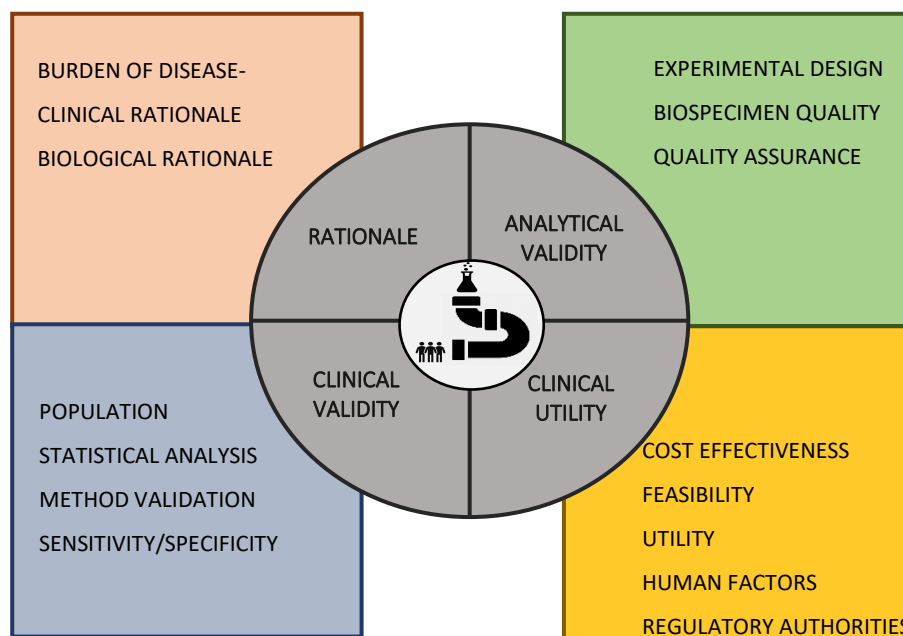

218

219

220

**Additional File Figure S2b: Biomarker characteristics associated with successful biomarker clinical implementation** These characteristics were identified using a systematic literature search. 125 attributes were identified and separated into four categories: Rationale, Clinical Validity, Clinical Utility and Analytical Validity.

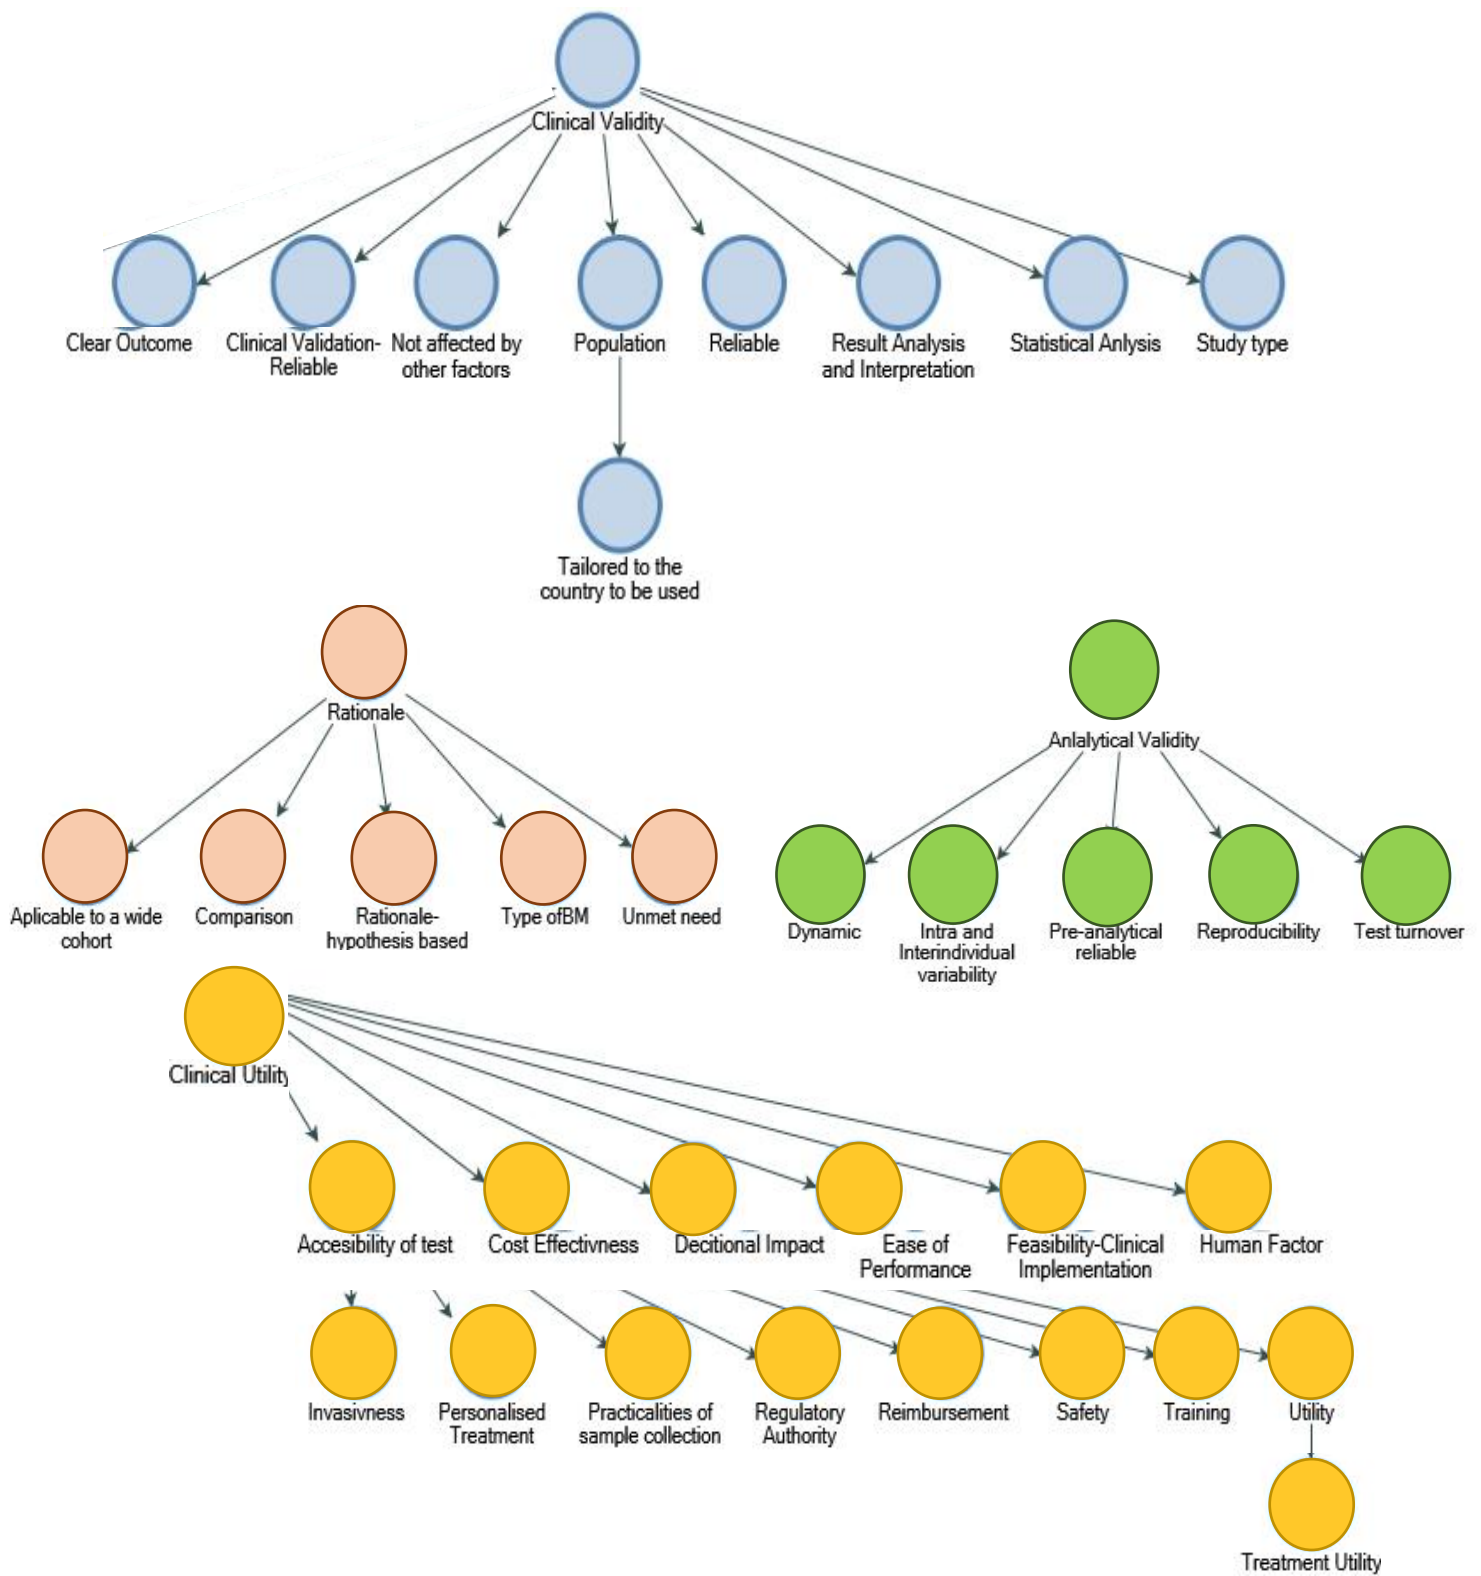

221

**Additional File Figure S3: Themes identified via semi-structured interview thematic analysis.** Thematic analysis and figures were constructed using Nvivo12 Pro.

222

223



224  
 225  
 226  
 227  
 228  
 229  
 230  
 231  
 232  
 233  
 234  
 235  
 236  
 237  
 238  
 239  
 240  
 241  
 242  
 243  
 244  
 245  
 246  
 247  
 248  
 249  
 250

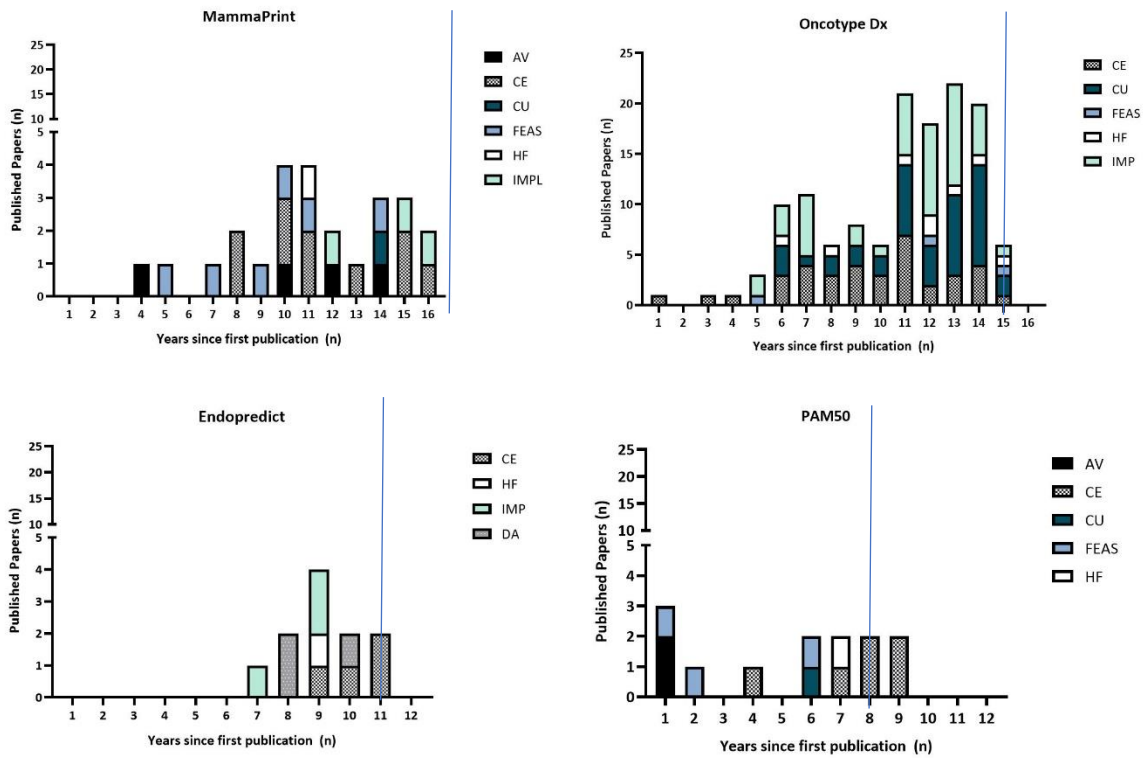

**Additional File Figure S4: Successful Biomarker Clinical Utility Studies** Stacked Bar chart showing AV, CE, CU, FEAS, HF, IMPL & DA studies in **A) MammaPrint, B) Oncotype Dx, C) PAM 50 and D) Endopredict**  
**AV:** Analytical Validity, **CE:** Cost Effectiveness, **CU:** Clinical Usefulness, **FEAS:** Feasibility; **HF:** Human Factor; **IMPL:** Implementation and **DA:** Decisional Analysis.

251  
 252  
 253  
 254  
 255  
 256  
 257  
 258  
 259  
 260  
 261  
 262  
 263  
 264  
 265  
 266  
 267  
 268  
 269  
 270  
 271  
 272  
 273  
 274  
 275

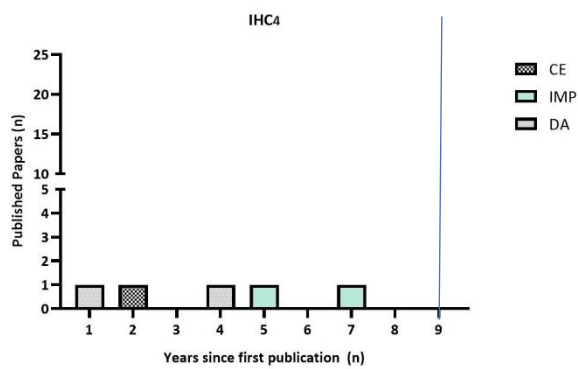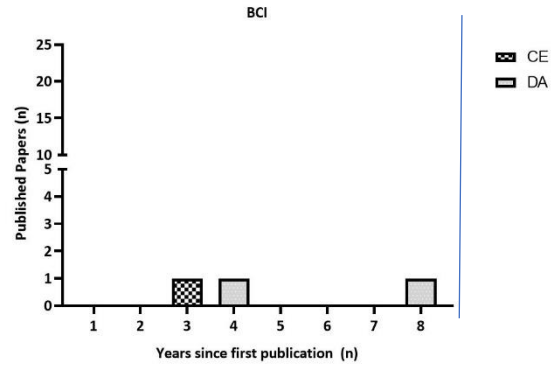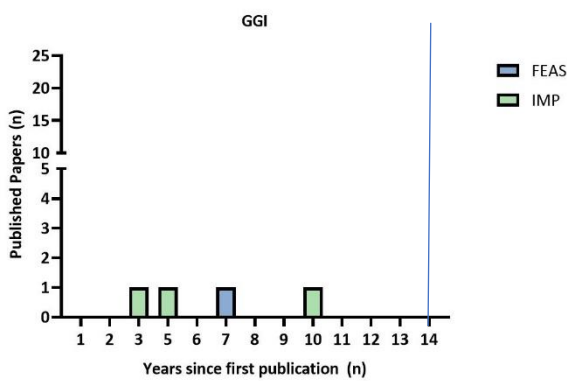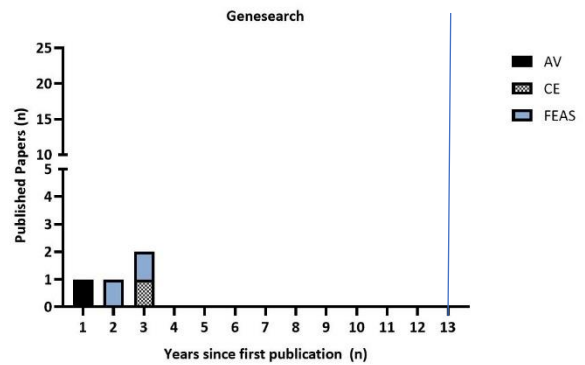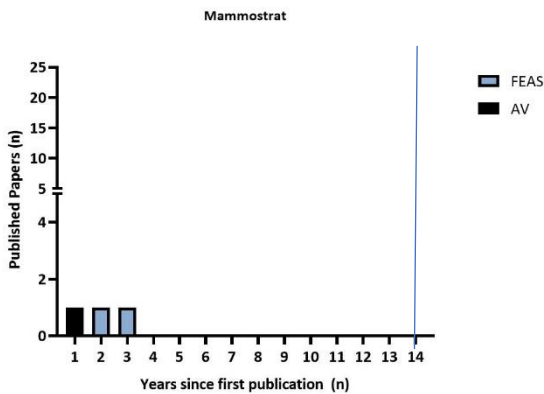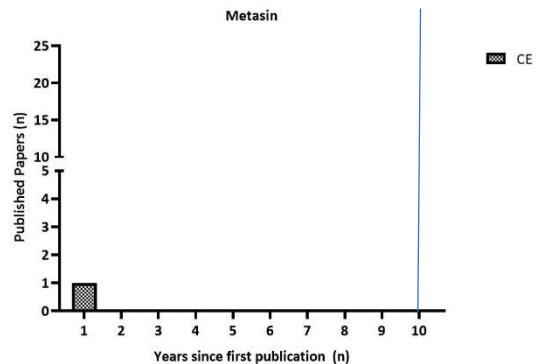

**Additional File Figure S5: Stalled Biomarker Clinical Utility Studies** Stacked Bar chart showing AV, CE, CU, FEAS, HF, IMPL & DA studies in **A) IHC4, B) BCI, C) GGI, D) GeneSearch, E) Mammostrat and F) Metasin**

**AV:** Analytical Validity, **CE:** Cost Effectiveness, **CU:** Clinical Usefulness, **FEAS:** Feasibility; **HF:** Human Factor; **IMPL:** Implementation and **DA:** Decisional Analysis.

276

Successful Biomarkers

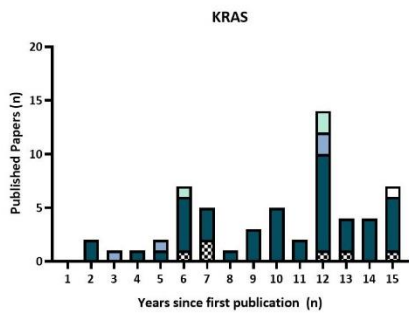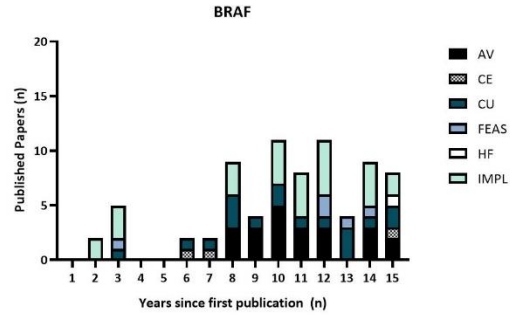

Stalled Biomarkers

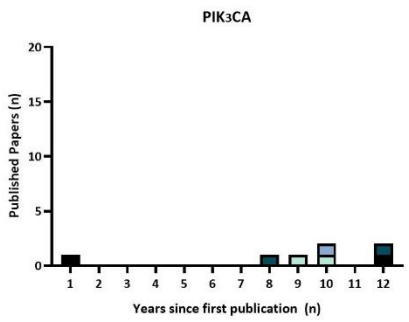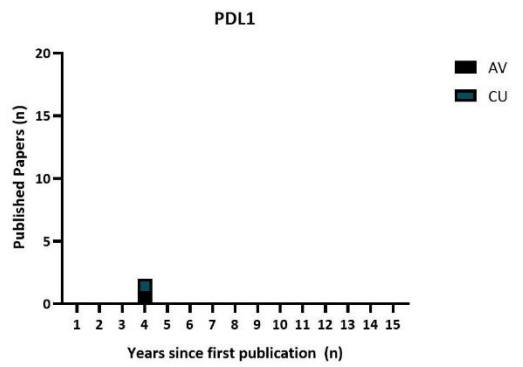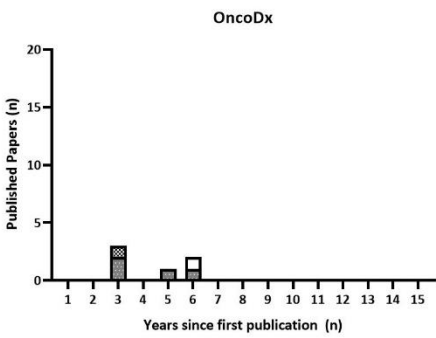

**Additional File Figure S6: Clinical Utility Studies** Stacked Bar showing AV, CE, CU, FEAS, HF, IMPL & DA studies in Staled and Successful Colorectal Cancer Biomarkers.

**AV:** Analytical Validity, **CE:** Cost Effectiveness, **CU:** Clinical Usefulness, **FEAS:** Feasibility; **HF:** Human Factor; **IMPL:** Implementation and **DA:** Decisional Analysis.

281 **ADDITIONAL FILE: METHODS**

282

283 A mixed methodology (combination of a qualitative and quantitative approach) was selected to  
284 address the main chapter objective and further develop the Biomarker Toolkit checklist. Initially,  
285 semi-structured interviews were conducted to allow in-depth exploration and communication of the  
286 different themes under the Biomarker checklist, identified by systematic literature search. An online  
287 Delphi Survey was also utilised to achieve expert consensus regarding these characteristics while  
288 also asking participants to:

- 289 i) Prioritise which category of biomarker attributes (Clinical Validity, Clinical Utility, Analytical  
290 Validity and Rationale) is more significant at each stage of the biomarker pipeline.  
291 ii) To rank attributes falling under each of these categories, for different biomarker types.

292 The study methodology was based on grounded theory which was characterised in 1967, by two  
293 sociologists, Glasser and Strauss, as the 'theory that was derived from data, systematically gathered  
294 and analysed through the research process'. Grounded theory has been described in different ways  
295 since its first characterisation, but there are certain core underlying features that remain crucial  
296 across all versions including: i) Simultaneous generation and collection of data via surveys,  
297 interviews, focus groups and literature, within other sources, ii) Initial coding and category  
298 identification, iii) Intermediate coding and subgrouping of codes into core categories and iv) Advance  
299 coding, a process in which the researcher interconnects coding between categories in an attempt to  
300 build a storyline grounded on the data.

301 The current study design was developed based on grounded theory with the support of qualitative  
302 expert SM.

### 303 **Semi-Structured Interviews**

304

#### 305 ***Participant Recruitment***

306

307 Participant recruitment for the semi-structured interviews was initiated in September 2019.

308 Participants were purposely recruited based on their expertise in the field of biomarker research.

309 Following up from Huddy et al. (2015), participants were separated in four different groups:

310 clinicians, academic/scientists, industry representatives and cancer patient

311 representatives/carers/survivors. A minimum of 8 participants were interviewed per group as a

312 pragmatic approach, taking into consideration the time scale of this study. Where necessary

313 additional interviews were conducted until thematic saturation was achieved. Participant inclusion

314 criteria involved being older than 18 years old, fitting in one of the previously stated groups and, in

315 the case of academic personnel, having a minimum of three years of experience in the biomarker

316 field. Participant exclusion criteria include vulnerable population e.g., individuals who have a

317 disability/illness that might affect their ability to give consent and non-English speakers. Potential

318 clinicians, scientist and industrial personnel were recruited via e-mail.

#### 319 ***Study Protocol for Semi-Structured Interview***

320

321 Semi-structured interview format enabled a flexible method of data acquisition, through the use of

322 pre-set open-ended questions as an interview guide/basis, allowing the interviewer to adjust the

323 wording of questions, according to participant response. Open-ended questions were introduced to

324 explore beliefs and thoughts of the participants, based on their own experiences. The interview

325 structure and dissemination material were generated by KVS in collaboration with a qualitative

326 research expert (SM), and then verified (MN and CJP). Initially, all participants were introduced to a

327 simplified version of the Biomarker Toolkit checklist shown in **Additional file: Figure S7**. All

328 characteristics detailed in the Biomarker Toolkit checklist were summarised and grouped according

329 to common themes to promote more efficient participant understanding. Interview questions and

330 dissemination material were adjusted and tailored to be comprehensible to all participant groups  
331 including cancer patient representative group, with the support of Imperial PERC.

332 During the interview the following semi-structured questions were asked:

- 333 • What do you think makes a good biomarker? Please list five characteristics linked with a  
334 successful biomarker.
- 335 • Please have a look in the table overleaf (**Additional file: Figure S7**) which lists biomarker  
336 attributes associated with clinical implementation, identified via a systematic literature search.  
337 Are there any attributes missing? Why do you think they are important?
- 338 • Demographics regarding participant age, sex, occupation, educational level and years  
339 of experience were also asked.

340

#### 341 ***Data confidentiality***

342

343 Data was anonymised, and participants were unidentifiable, as each one was given a unique ID.  
344 Interview response were audio recorded and transcribed verbatim, after which the data were  
345 immediately encrypted and stored. These data will only be accessible by members of the research  
346 team. Electronically transcribed data were subsequently thematically analysed using Nvivo Pro  
347 V.10.1.1 software (QSR International, Melbourne, Victoria, Australia). Electronic transcripts were not  
348 returned to participants, unless transcript clarifications were needed.

349

| BM ATTRIBUTE        |                         | BM ATTRIBUTE DESCRIPTION                                                                                                                                                                  |
|---------------------|-------------------------|-------------------------------------------------------------------------------------------------------------------------------------------------------------------------------------------|
| RATIONALE           | BURDEN OF DISEASE       | Does the BM address a disease of unmet need?                                                                                                                                              |
| ANALYTICAL VALIDITY | EXPERIMENTAL DESIGN     | Are appropriate control groups/reference standards assigned?/ Are the experimental outcomes clearly reported? /Does the design consider blinding to avoid bias?                           |
|                     | BIOSPECIMEN QUALITY     | Is the sample appropriately collected, stabilised, stored and transported? / Is the sample collected using a SOP?/ Does the sample utilised address the research question?                |
|                     | QUALITY ASSURANCE       | Are the equipment used appropriately calibrated/assessed for their performance?/ Is there any technical variability?                                                                      |
| CLINICAL VALIDITY   | SENSITIVITY/SPECIFICITY | Is the BM able to correctly identify target population? e.g. Can the BM distinguish between high and low risk patients with high sensitivity & specificity?                               |
|                     | METHOD VALIDATION       | Is the technique used to measure/ assess BM levels validated and standardised? Or is it under development?                                                                                |
|                     | POPULATION              | Does the population included in the study address the research question?/ Are exclusion and inclusion criteria clearly stated?/ Will the population selected result in high risk of bias? |
|                     | STATISTICAL ANALYSIS    | Is the data collected appropriately analysed (Confidence intervals and odds ratio included)?<br>Is the model performance reported (e.g. Survival Analysis)?                               |
| CLINICAL UTILITY    | HUMAN FACTOR            | Is the BM detection method acceptable by the patient and clinician?                                                                                                                       |
|                     | ETHICAL APPROVAL        | Is the study ethically approved?                                                                                                                                                          |
|                     | REGULATORY AUTHORITIES  | Is the BM FDA/NICE approved?                                                                                                                                                              |
|                     | COST EFFECTIVENESS      | Does implementation of this BM result in reduced hospital admissions /more expensive tests/more expensive drugs?                                                                          |
|                     | FEASIBILITY             | Can it be implemented in clinical practice?                                                                                                                                               |
|                     | UTILITY                 | Can the BM be incorporated in clinical care? Is the technique used to assess BM automated? / Who will benefit from utilisation of this BM?                                                |

**Additional File Figure S7:** Simplified version of the Biomarker Toolkit. This table was shown and discussed with the participants at Q2, during semi-structured interviews.

**BM:** Biomarker

351

352 **Data Analysis**

353

354 Interviews were coded based on predetermined themes, according to the detailed Biomarker Toolkit

355 checklist, while additional emerging themes were added according to participant responses. The

356 interviewer was allowed to contact the participants to clarify sections of the interview, if unclear.

357 Interviews were piloted with four participants (2 clinicians, 2 academics), and 20% of the interviews

358 were coded by a second qualitative researcher (SW). Reporting of semi-structured interviews was

359 conducted following the COREQ checklist.

360

361

362 **Delphi Survey Round 1**

363

364 ***Participants***

365

366 Inclusion and exclusion criteria were the same as previously described in the method section.

367 Following up from the semi-structured interview recruitment strategy, a minimum of eight

368 participants were purposely recruited. Potential clinicians, scientists and industrial personnel were

369 purposely recruited via e-mail. An online link of the survey, a digital consent form and participant

370 information leaflet was electronically distributed in a targeted manner with a snowball approach.

371 Reminder emails were sent every two weeks, within the first month, after the initial email invite.

372

373 ***Study Protocol for Delphi Round 1***

374

375 The online Delphi survey was designed by KVS and reviewed by qualitative expert SM and CJP, using

376 Qualtrics platform. All emergent themes from the systematic literature search and the semi-

377 structured interviews were conveyed in a series of statements in the Qualtrics questionnaire

378 (Qualtrics Labs Inc, Provo, UT). Due to the high number of characteristics in the Biomarker Toolkit

379 checklist (n>120), statements in the checklist were thematically grouped into 51 categories to allow

380 a more efficient review and improve participant usability (Analytical Validity:13, Clinical Validity: 16,

381 Clinical Utility: 17, Rationale: 5).

382 To address our research questions, the study was separated in three stages:

383 **Stage A:** Aimed to reach consensus regarding the characteristics related to successful biomarker

384 translation, using a five point of agreement Likert scale (Disagree, Somewhat disagree, Neutral,

385 Somewhat agree, Agree). Responders were given the chance to add additional characteristics under

386 each subcategory (Clinical Validity, Clinical Utility, Analytical Validity and Rationale), using free text

387 questions at the end of each section.



388 **Stage B:** Aimed to prioritise which category of biomarker attributes (Clinical Validity, Clinical Utility,  
389 Analytical Validity and Rationale) is more important at each stage of the biomarker pipeline, using a  
390 5 point of importance Likert scale (Not Important (=5), Somewhat Important (=4), Important (=3),  
391 Very important (=2), Extremely important (=1)).

392 **Stage C:** Aimed to prioritise attributes related to each biomarker type and evaluate whether  
393 difference in the type of biomarker results in different attribute prioritisation, using rankings from 1-  
394 5, where 1 denotes highest importance while 5 corresponds to the least important.

395 A maximum of three rounds were allowed, and a consensus threshold was set at 75% agreement  
396 amongst participants. Upon round 1 completion, all responses were exported and analysed in  
397 Microsoft Excel (2007) while they were graphically presented in GraphPad prism (La JoLa, California,  
398 US).

399

## 400 **Delphi Round 2**

401

### 402 ***Study Participants***

403

404 Recruitment approach of Delphi Round 2 was the same as Delphi Round 1.

405

### 406 ***Study Protocol for Delphi Round 2***

407

408 Biomarker characteristics in Round 1-Stage A that did not reach consensus during the first phase of  
409 the Delphi, were re-assessed during Delphi Round 2. At this stage, potential items were recorded as  
410 additional characteristics in the Biomarker checklist, based on participant input in the free text  
411 questions of Round 1-Stage A. In this round the results of Delphi-Round 1 -Stage A were shared in an  
412 anonymous manner. This allowed participants to reconsider their responses in light of the results, in  
413 an attempt to achieve 75% consensus in the remaining items. The Delphi was open from Oct-Dec  
414 2020, and it was expected to take 10 minutes to complete. This round was also kept active for the

415 extended period of three months, due to the impact of COVID-19 and participant request to extend  
416 the deadline.

417

418 ***Ethical Approval***

419

420 Information provided by the responders was kept anonymised and participant information remained  
421 confidential, e.g., name, DOB, etc. Study participation was voluntary, while all potential participants  
422 had the right to refuse or withdraw from the study at any given point. In both semi-structured  
423 interviews and Delphi, participants were provided a patient information leaflet and were allowed  
424 enough time to make an informed decision in respect to their participation in the study (at least two  
425 weeks). Both sectors of these studies were approved by the Head of the Department and the Joint  
426 Research Compliance.

427

428

429

430

431

432

433

434

435

436

437

438

439

440 **Score Manual**

441

442 In Step 1 the average of scores of all attributes addressing Analytical Validity, Clinical Validity & Clinical  
443 Utility are generated for each clinical study using the following formulae (equations 1a-c):

444

Equations 1a-c

446 
$$AV_j = \frac{\sum_{i=1}^{N_1} AV_i^j}{N_1}$$

447

448 
$$CV_j = \frac{\sum_{i=1}^{N_2} CV_i^j}{N_2}$$

449

450 
$$CU_j = \frac{\sum_{i=1}^{N_3} CU_i^j}{N_3}$$

451

452

453

454

455

- j: Study number
- J: All studies
- i:1-n number of attributes
- AV: Analytical validity
- CV: Clinical validity
- CU: Clinical utility
- DA: Decision analysis
- N<sub>1</sub>: Total number of attributes in the AV category
- N<sub>2</sub>: Total number of attributes in the CV category
- N<sub>3</sub>: Total number of attributes in the CU category
- AV<sub>i</sub><sup>j</sup> : denotes i<sup>th</sup> attribute of j<sup>th</sup> study under the AV category
- CV<sub>i</sub><sup>j</sup> : denotes i<sup>th</sup> attribute of j<sup>th</sup> study under the CV category
- CU<sub>i</sub><sup>j</sup> : denotes i<sup>th</sup> attribute of j<sup>th</sup> study under the CU category
- IMPL: Implementation Studies
- HF: Human Factor

456 We now illustrate how one uses the formulae in practise. Below you can see a simplified version of  
457 the toolkit, with a few of the attributes, as a worked example for score calculation. In the following  
458 example, there are 5 studies in total and N<sub>1</sub> is 4, N<sub>2</sub> is 6 and N<sub>3</sub> is 3. As shown in Worked Example  
459 Part 1, study 1 is scored based on the reporting of specific attributes. For instance, using  
460 “Experimental design” as an example: if experimental design is clearly reported in the journal, then  
461 the study scores “1”, otherwise “0” is assigned.

462 At the first step, the average of the scores from all attributes, per study, per category is calculated.

463 This is repeated for all clinical studies regarding each biomarker being assessed.

Worked Example Part 1:

464

| BM ATTRIBUTE        |                         | Study 1 | Study 2 | Study 3 | Study 4 | Study x |      |
|---------------------|-------------------------|---------|---------|---------|---------|---------|------|
| DISEASE BURDEN      | RATIONALE               |         |         |         |         |         |      |
| ANALYTICAL VALIDITY | EXPERIMENTAL DESIGN     | 1       | 1       |         |         |         |      |
|                     | BIOSPECIMEN QUALITY     | 0       | 1       |         |         |         |      |
|                     | QUALITY ASSURANCE       | 1       | 1       |         |         |         |      |
|                     | CELL CULTURE            | 1       | 1       |         |         |         |      |
| SUM                 |                         | 3       | 4       | 4       | 2       | 1       |      |
| AVERAGE             |                         | 3/4     | 4/4     | 4/4     | 2/4     | 1/4     | 0.70 |
| CLINICAL VALIDITY   | ADVERSE EVENTS          | 1       | 1       |         |         |         |      |
|                     | POPULATION DETAILS      | 1       | 0       |         |         |         |      |
|                     | MISSING DATA            | 0       | 0       |         |         |         |      |
|                     | RANDOMISATION           | 0       | 0       |         |         |         |      |
|                     | SENSITIVITY/SPECIFICITY | 1       | 1       |         |         |         |      |
|                     | STATISTICAL MODELLING   | 1       | 1       |         |         |         |      |
| SUM                 |                         | 4       | 3       | 5       | 2       | 4       |      |
| AVERAGE             |                         | 4/6     | 3/6     | 5/6     | 2/6     | 4/6     | 0.60 |
| CLINICAL UTILITY    | COST EFFECTIVENESS      | 0       | 0       |         |         |         |      |
|                     | FEASIBILITY             | 1       | 0       |         |         |         |      |
|                     | UTILITY                 | 1       | 0       |         |         |         |      |
| SUM                 |                         | 2       | 0       | 0       | 1       | 2       |      |
| AVERAGE             |                         | 2/3     | 0/3     | 0/3     | 1/3     | 2/3     | 0.33 |

Step 1 (Annotations: Red boxes around 'Step 1' labels and arrows pointing to the average calculation cells in the orange rows.)

Step 2 (Annotation: Grey box around the 'AVERAGE' row for the Clinical Utility category.)

Step 3 (Annotation: Grey box around the 'AVERAGE' row for the Analytical Validity category.)

**Worked Example Part 1:** Step 1 of score calculations using Equations 1a-c. The sum of scores per study is calculated and then divided by the number of attributes in that category. i.e. Sum of scores for study 1, Analytical Validity related attributes is “3” and the total number of attributes is “4”. Thus, as seen in the orange row the average for this sector is: “3/4”. The same is repeated for each study in each main category of attributes

465

466

467

468

469

470 Attributes included in Clinical Utility section including Cost Effectiveness, Feasibility and Impact of  
471 biomarker application were not addressed by clinical studies. Therefore, Clinical Utility score  
472 generated from clinical studies was adjusted, taking into consideration their publication date, based  
473 on the presence of Implementation, Feasibility, Cost-effectiveness, Utility and Human Factor studies  
474 (equation 2 d). Score '100' was assigned to primary studies addressing biomarker  
475 Implementation/Feasibility/Cost-effectiveness/Utility/Human factors; otherwise '0' score was  
476 assigned. Thus, in step 2 the Non-Adjusted Clinical Utility score is amended using equation 2. Below  
477 the equation you can see the calculation for the worked example. Taking into consideration that:

- 478 i) study 1 is published in 2008
- 479 ii) the biomarker studied in the worked example has a Cost effectiveness study (2006), a  
480 decisional analysis study (2003) and a human factor study (2009) associated with it.

481 As seen in equation 2, the non-adjusted % Clinical Utility score from step 1 is used together with  
482 positive score for the Cost Effectiveness and Decisional Analysis study that was published before  
483 2008 (100% was assigned, as cost effectiveness and decisional analysis studies were present- see  
484 equation 2 worked example). The Human Factor study was issued after study 1 was published;  
485 thus it was not used to amend the Clinical Utility score of Study 1.

486

487

488

489

490

491

492

**Equation 2:**

$$493 \quad Adj. CU_j = \frac{(CU_j * 100) + U_j + CE_j + IMP/FEAS_j + DA_j + HF_j}{6}$$

494 where the present quantities are defined as follows:

$$496 \quad U_j = \begin{cases} 100, & \text{if present} \\ 0, & \text{otherwise} \end{cases}$$

$$495 \quad CE_j = \begin{cases} 100, & \text{if present} \\ 0, & \text{otherwise} \end{cases}$$

$$497 \quad IMP/FEAS_j = \begin{cases} 100, & \text{if present} \\ 0, & \text{otherwise} \end{cases}$$

$$498 \quad DA_j = \begin{cases} 100, & \text{if present} \\ 0, & \text{otherwise} \end{cases}$$

$$499 \quad HF_j = \begin{cases} 100, & \text{if present} \\ 0, & \text{otherwise} \end{cases}$$

501

502

500

503

504

j: Study number  
 J: All studies  
 i:1-n number of attributes  
 AV: Analytical Validity  
 CV: Clinical Validity  
 CU: Clinical Utility  
 DA: Decision analysis  
 N<sub>1</sub>: Total number of attributes in the AV category  
 N<sub>2</sub>: Total number of attributes in the CV category  
 N<sub>3</sub>: Total number of attributes in the CU category  
 AV<sub>i</sub><sup>j</sup> : denotes i<sup>th</sup> attribute of j<sup>th</sup> study under the AV category  
 CV<sub>i</sub><sup>j</sup> : denotes i<sup>th</sup> attribute of j<sup>th</sup> study under the CV category  
 CU<sub>i</sub><sup>j</sup> : denotes i<sup>th</sup> attribute of j<sup>th</sup> study under the CU category  
 IMPL: Implementation Studies  
 HF: Human Factor

**Worked Example Part 2:**

| BM ATTRIBUTE        |                         | Study 1 | Study 2 | Study 3 | Study 4 | Study x |      |
|---------------------|-------------------------|---------|---------|---------|---------|---------|------|
| DISEASE BURDEN      | RATIONALE               |         |         |         |         |         |      |
| ANALYTICAL VALIDITY | EXPERIMENTAL DESIGN     | 1       | 1       |         |         |         |      |
|                     | BIOSPECIMEN QUALITY     | 0       | 1       |         |         |         |      |
|                     | QUALITY ASSURANCE       | 1       | 1       |         |         |         |      |
|                     | CELL CULTURE            | 1       | 1       |         |         |         |      |
| SUM                 |                         | 3       | 4       | 4       | 2       | 1       |      |
| AVERAGE             |                         | 3/4     | 4/4     | 4/4     | 2/4     | 1/4     | 0.70 |
| CLINICAL VALIDITY   | ADVERSE EVENTS          | 1       | 1       |         |         |         |      |
|                     | POPULATION DETAILS      | 1       | 0       |         |         |         |      |
|                     | MISSING DATA            | 0       | 0       |         |         |         |      |
|                     | RANDOMISATION           | 0       | 0       |         |         |         |      |
|                     | SENSITIVITY/SPECIFICITY | 1       | 1       |         |         |         |      |
|                     | STATISTICAL MODELLING   | 1       | 1       |         |         |         |      |
| SUM                 |                         | 4       | 3       | 5       | 2       | 4       |      |
| AVERAGE             |                         | 4/6     | 3/6     | 5/6     | 2/6     | 4/6     | 0.60 |
| CLINICAL UTILITY    | COST EFFECTIVENESS      | 0       | 0       |         |         |         |      |
|                     | FEASIBILITY             | 1       | 0       |         |         |         |      |
|                     | UTILITY                 | 1       | 0       |         |         |         |      |
| SUM                 |                         | 2       | 0       | 0       | 1       | 2       |      |
| AVERAGE             |                         | 2/3     | 0/3     | 0/3     | 1/3     | 2/3     | 0.27 |

Step 3

Step 1

Step 2

$$Adjusted\ CU\ score = AVERAGE\left(\left(\frac{2}{3}\right) * 100\right) + 100 + 100 + 0 + 0 + 0$$

**Worked Example Part 2:** This uses equation 2 to adjust the Clinical Utility score based on the presence of a cost effectiveness study (2006) and a decisional analysis study (2003). “2/3” represents the score of Clinical Utility, for study 1 (=2) (worked example 1), divided by the total number of attributes (=3). 2/3 is then multiplied by 100 to become a percentage. “100” is assigned for the presence of i) cost effectiveness study and a ii) decisional analysis study. “0” is assigned for utility, feasibility/implementation, and human factor studies as there were none conducted prior to study 1 publication date (2008).

511

512

513

514 In step 3, the sum of all of the attributes, for all of the studies identified in the biomarker of interest  
 515 is calculated using the formulae:

Equations 3a-c:

517

518

$$AV\ score = \frac{\sum_{j=1}^J (AV_j)}{J}$$

$$CV\ score = \frac{\sum_{j=1}^J (CV_j)}{J}$$

$$Adjusted\ CU\ Score = \frac{\sum_{j=1}^J (Adj.\ CU_j)}{J}$$

**Worked Example Part 3:**

519

| BM ATTRIBUTE        |                         | Study 1 | Study 2 | Study 3 | Study 4 | Study x |                    |
|---------------------|-------------------------|---------|---------|---------|---------|---------|--------------------|
| DISEASE BURDEN      | RATIONALE               |         |         |         |         |         |                    |
| ANALYTICAL VALIDITY | EXPERIMENTAL DESIGN     | 1       | 1       |         |         |         |                    |
|                     | BIOSPECIMEN QUALITY     | 0       | 1       |         |         |         |                    |
|                     | QUALITY ASSURANCE       | 1       | 1       |         |         |         |                    |
|                     | CELL CULTURE            | 1       | 1       |         |         |         |                    |
| SUM                 |                         | 3       | 4       | 4       | 2       | 1       |                    |
| AVERAGE             |                         | 3/4     | 4/4     | 4/4     | 2/4     | 1/4     | 0.70 <b>Step 3</b> |
| CLINICAL VALIDITY   | ADVERSE EVENTS          | 1       | 1       |         |         |         | Step 1             |
|                     | POPULATION DETAILS      | 1       | 0       |         |         |         |                    |
|                     | MISSING DATA            | 0       | 0       |         |         |         |                    |
|                     | RANDOMISATION           | 0       | 0       |         |         |         |                    |
|                     | SENSITIVITY/SPECIFICITY | 1       | 1       |         |         |         |                    |
|                     | STATISTICAL MODELLING   | 1       | 1       |         |         |         |                    |
| SUM                 |                         | 4       | 3       | 5       | 2       | 4       |                    |
| AVERAGE             |                         | 4/6     | 3/6     | 5/6     | 2/6     | 4/6     | 0.60 <b>Step 3</b> |
| CLINICAL UTILITY    | COST EFFECTIVENESS      | 0       | 0       |         |         |         |                    |
|                     | FEASIBILITY             | 1       | 0       |         |         |         |                    |
|                     | UTILITY                 | 1       | 0       |         |         |         |                    |
| SUM                 |                         | 2       | 0       | 0       | 1       | 2       |                    |
| AVERAGE             |                         | 2/3     | 0/3     | 0/3     | 1/3     | 2/3     | 0.27 <b>Step 2</b> |

**Worked Example Part 3:** Stage 3 of score calculations using Equations 3 (a-d). † Star indicates that raw Clinical Utility scores, that are used to generate the adjusted Clinical Utility score using equation 2.

529

530

531



532 In step 4, the overall score is calculated (equation 3) by averaging the scores identified in step 3  
533 assuming that variables are of equal importance.

Equation 4:<sup>534</sup>

Assumption: Variables are of equal importance

$$Overall\ score = \frac{CV\ Score(\%) + AV\ Score(\%) + Adjusted\ CU\ score(\%)^{535}}{3}$$

536

537 For instance, in the example above we have:

$$Overall\ Score = \frac{(0.70 * 100) + (0.60 * 100) + (0.45 * 100)}{3}$$

538

**Worked Example Part 4:** Equation 4 was used to calculate the overall score from the worked example. These three % scores are divided by three to achieve an average between the three categories which corresponds to the overall score.

539

540 It should be noted that if the Biomarker test in the selected publications was conducted under  
541 commercial laboratories, the scores under the relevant subcategory (Analytical Validity) were  
542 adjusted based on relevant publications content, where applicable. For example if an assay  
543 optimisation publication was identified for biomarker X, then “1” would be assigned in the attribute  
544 “Did the study report study optimisation?”, in every publication that used this specific optimised  
545 assay.

546

547

548

549

550

551

552 **Statistical Analysis Justification**

553 Cox regression (or proportional hazards regression) is used to formulate predictive model for  
554 time-to-event data. For the purpose of this analysis “event” was considered to be biomarker  
555 stalling. In this paper Cox-Regression was used as it enables the evaluation of the effects of  
556 several variables, taking into consideration the effect of time. In this case study publication  
557 date was considered in the model, in addition to other variables including: i.e., Clinical Validity,  
558 Clinical Utility and Analytical Validity scores in addition to biomarker type. Therefore, the  
559 influence of variables on time-to-event occurrence could be investigated.

560 A logistic regression was performed to assess the relation of each biomarker’s: **i)** sub-category  
561 score, **ii)** Analytical Validity score, **iii)** Clinical Validity score, **iv)** Clinical Utility score and **v)** Total  
562 % score with Biomarker implementation status. Since implementation status is a binary  
563 measure, logistic regression was used, which also allows the assessment of how well the set  
564 of variables can predict the categorical dependant variable (biomarker success) and provide a  
565 summary of accuracy % regarding the classification of your cases. This can be used to  
566 determine the % of correct predictions generated by the model.

567

568

569

570

571

572

573

574

575

576

577
